# Supplementary material
Source: PubMed Central journal article supplement (PMC3852038)
Supplement: mmc2.pdf [file mmc2.pdf]

# A Stochastic Model of Calcium Puffs Based on Single-Channel Data

Pengxing Cao,<sup>†</sup> Graham Donovan,<sup>†</sup> Martin Falcke,<sup>‡</sup> and James Sneyd<sup>†\*</sup>

<sup>†</sup>Department of Mathematics, The University of Auckland, Auckland, New Zealand; and <sup>‡</sup>Mathematical Cell Physiology, Max Delbrück Center for Molecular Medicine, Berlin, Germany

**ABSTRACT** Calcium puffs are local transient  $\text{Ca}^{2+}$  releases from internal  $\text{Ca}^{2+}$  stores such as the endoplasmic reticulum or the sarcoplasmic reticulum. Such release occurs through a cluster of inositol 1,4,5-trisphosphate receptors ( $\text{IP}_3\text{Rs}$ ). Based on the  $\text{IP}_3\text{R}$  model (which is determined by fitting to stationary single-channel data) and nonstationary single-channel data, we construct a new  $\text{IP}_3\text{R}$  model that includes time-dependent rates of mode switches. A point-source model of  $\text{Ca}^{2+}$  puffs is then constructed based on the new  $\text{IP}_3\text{R}$  model and is solved by a hybrid Gillespie method with adaptive timing. Model results show that a relatively slow recovery of an  $\text{IP}_3\text{R}$  from  $\text{Ca}^{2+}$  inhibition is necessary to reproduce most of the experimental outcomes, especially the nonexponential interpuff interval distributions. The number of receptors in a cluster could be severely underestimated when the recovery is sufficiently slow. Furthermore, we find that, as the number of  $\text{IP}_3\text{Rs}$  increases, the average duration of puffs initially increases but then becomes saturated, whereas the average decay time keeps increasing linearly. This gives rise to the observed asymmetric puff shape.

## INTRODUCTION

Intracellular  $\text{Ca}^{2+}$  signals, such as  $\text{Ca}^{2+}$  oscillations or waves, play a significant role in regulating many cellular activities, such as synaptic transmission, muscle contraction, saliva secretion, and cell fertilization and division (1–4). In many cell types,  $\text{Ca}^{2+}$  waves and oscillations are the result of  $\text{Ca}^{2+}$  liberation through clustered inositol 1,4,5-trisphosphate receptors ( $\text{IP}_3\text{Rs}$ ) located in the membrane of the endoplasmic reticulum (ER) or the sarcoplasmic reticulum (SR).

$\text{Ca}^{2+}$  signaling is organized in a hierarchical manner (5). At the lowest level, stochastic release of  $\text{Ca}^{2+}$  through a single  $\text{IP}_3\text{R}$  results in a small localized increase in cytoplasmic  $\text{Ca}^{2+}$  concentration ( $[\text{Ca}^{2+}]$ ), called a  $\text{Ca}^{2+}$  “blip.” Given the tightly clustered arrangement of  $\text{IP}_3\text{Rs}$ , a  $\text{Ca}^{2+}$  blip can stimulate the release of additional  $\text{Ca}^{2+}$  through neighboring  $\text{IP}_3\text{Rs}$  to cause release from a cluster of  $\text{IP}_3\text{Rs}$ , giving a larger, but still localized, increase in  $[\text{Ca}^{2+}]$ , called a  $\text{Ca}^{2+}$  “puff.” At the highest level of organization, if enough puffs are generated, they can form a propagating wave of increased  $[\text{Ca}^{2+}]$  across an entire cell.

Thus, a detailed study of  $\text{Ca}^{2+}$  puffs is necessary for understanding the dynamics of  $\text{Ca}^{2+}$  waves. Furthermore, an understanding of  $\text{Ca}^{2+}$  puffs relies on an accurate model of the  $\text{IP}_3\text{R}$ , a model that can generate the correct statistical properties of the openings and closings of a single  $\text{IP}_3\text{R}$ .

Until relatively recently, such a model was not available. Early  $\text{IP}_3\text{R}$  models, such as the DeYoung–Keizer model (6) or the Atri model (7), reproduced such approximate statistics as the mean open time, or the steady-state open probability, but were based either on steady-state data alone or on single-channel data from lipid bilayers (8). In the years

following those two initial models, many attempts were made to improve the  $\text{IP}_3\text{R}$  models, including such features as time-dependent  $\text{IP}_3\text{R}$  inactivation and multiple inactivated or inhibited states (9,10).

However, the field of  $\text{IP}_3\text{R}$  modeling was dramatically changed by the appearance of new data, to our knowledge, of single-channel openings and closings from  $\text{IP}_3\text{R}$  in vivo (11–13). For the first time, modelers were able to construct models of a single  $\text{IP}_3\text{R}$  that could reproduce the correct statistical single-channel behavior in vivo (14–16). To our knowledge, these new data show that a single  $\text{IP}_3\text{R}$  behaves in ways that cannot be reproduced by the older models. In particular, it appears that  $\text{IP}_3\text{Rs}$  exist in different modes, each of which has a different open probability, and that activation of the  $\text{IP}_3\text{R}$  is caused by a switch from one mode to another.

There are a number of studies of  $\text{Ca}^{2+}$  puffs already in the literature (17–27). Without exception, they are all based on older  $\text{IP}_3\text{R}$  models, and thus fail to capture important aspects of the stationary behavior of a single  $\text{IP}_3\text{R}$ . Hence, in light of recent data and models, it is necessary to reexamine the question of  $\text{Ca}^{2+}$  puff formation and how the hierarchy of  $\text{Ca}^{2+}$  signaling is constructed.

In particular, we wish to address some outstanding questions in the field. There are a number of such questions, but the ones we address here are as follows:

- What is the mechanism of puff termination? Do the  $\text{IP}_3\text{Rs}$  close due to inhibition by  $\text{Ca}^{2+}$ , by stochastic attrition, or by some other inherent process?
- What determines the distribution of interpuff intervals? Thurley et al. (28) performed a detailed analysis of interpuff intervals (IPI), that is, the waiting time between successive puffs, and found that some puff sites exhibit exponential IPI distributions but most sites have nonexponential distributions with a maximum at times larger than

Submitted March 3, 2013, and accepted for publication July 24, 2013.

\*Correspondence: [sneyd@math.auckland.ac.nz](mailto:sneyd@math.auckland.ac.nz)

Editor: Michael Pusch.

© 2013 by the Biophysical Society  
0006-3495/13/09/1133/10 \$2.00

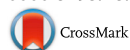

<http://dx.doi.org/10.1016/j.bpj.2013.07.034>

0 s. This shows the stochastic occurrence of puffs is usually but not necessarily influenced by an inhibitory effect from the previous puffs, implying that the time constant of the inhibitory effect could be different for different puff sites. What kind of mechanism can generate both exponential and nonexponential IPI distributions? Is it possible that the mechanism is intrinsic to the IP<sub>3</sub>R instead of local depletion of the ER/SR, which has been shown to be unlikely by Ullah et al. (27)?

The most recent IP<sub>3</sub>R model is due to Siekmann et al. (16). The advantage of the Siekmann model is that its topological structure and transition rates are determined by Markov chain Monte Carlo (MCMC) fitting (29) directly to the stationary single-channel current traces instead of fitting only to statistical distributions. However, the Siekmann model fails to describe some earlier findings of transient behaviors shown in Mak et al. (13). To overcome this problem, we develop a new IP<sub>3</sub>R model with time-dependent state transitions by incorporating the recent nonstationary single-channel data from Mak et al. into the Siekmann model. Both of these data sets are measured from intact cells, and thus represent a significant improvement on the data used to construct previous models of the IP<sub>3</sub>R.

## THE MODEL

### The Siekmann IP<sub>3</sub>R model

The Siekmann IP<sub>3</sub>R model is a six-state Markov model (Fig. 1) comprising two modes, park and drive, each of which has multiple closed and open states. When in park mode, the IP<sub>3</sub>R is mostly closed. When in drive mode, the IP<sub>3</sub>R is mostly open.

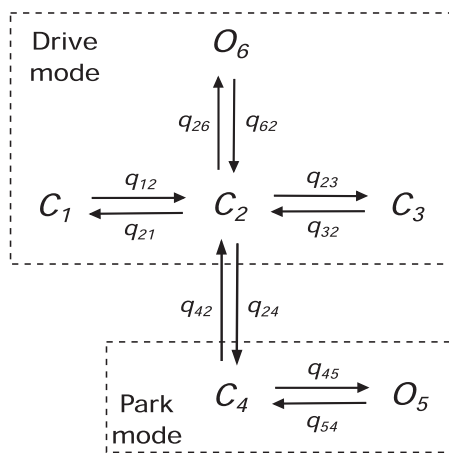

FIGURE 1 The structure of the Siekmann IP<sub>3</sub>R model. *C* represents closed state and *O* is open state; *q<sub>s</sub>* are transition rates connecting two adjacent states and indicating how fast an IP<sub>3</sub>R switches between the two states. The entire structure comprises two parts: One is the high-activity part or drive mode, containing three closed states *C*<sub>1</sub>, *C*<sub>2</sub>, *C*<sub>3</sub>, and one open state *O*<sub>6</sub>. The other is the low-activity part or park mode, which includes one closed state *C*<sub>4</sub> and one open state *O*<sub>5</sub>.

This model can be applied to two different isoforms of the IP<sub>3</sub>R, IP<sub>3</sub>R-1 and IP<sub>3</sub>R-2, by fitting the model to the corresponding single-channel data. Here, we focus on IP<sub>3</sub>R-1.

All the transition rates are constants except *q*<sub>24</sub> and *q*<sub>42</sub>, and are given in Table S1 in the Supporting Material. In park mode, because *q*<sub>54</sub> is ~300 times greater than *q*<sub>45</sub>, the steady-state open probability of IP<sub>3</sub>R is almost zero. Conversely, in drive mode, the steady-state open probability is around 70% because of the fast transition pair of *q*<sub>26</sub> and *q*<sub>62</sub>. The transitions *q*<sub>24</sub> and *q*<sub>42</sub> connecting the park and drive modes determine the open probability of the IP<sub>3</sub>R and are dependent on [Ca<sup>2+</sup>], [IP<sub>3</sub>], and [ATP] (12). For given [ATP] and [IP<sub>3</sub>], steady-state values of *q*<sub>24</sub> and *q*<sub>42</sub> are computed for different [Ca<sup>2+</sup>] (see symbols in Fig. S1). The stationary data were measured only at 0.1 mM and 5 mM [ATP]s (12,16). We use 0.1 mM [ATP] because it is closer to the [ATP] of 0.5 mM used for obtaining the dynamic data of Mak et al. (13). Investigating the effect of varying [ATP] needs more data and is beyond our current scope.

### Incorporation of nonstationary data

Although, in theory, the openings and closing of the IP<sub>3</sub>R (in a stationary state) will contain enough information to characterize completely the rate constants in the Markov model, and thus determine the nonstationary behavior as well, in practice this is not the case here. Our stationary data, although sufficient to characterize the stationary behavior of the IP<sub>3</sub>R, do not contain enough information to also determine the transient behavior of the receptor (see Discussion).

We get around this difficulty by using additional data on transient responses and incorporate these data in a heuristic fashion rather than by the addition of states to the Markov model. Mak et al. (13) measured dynamic properties of the response of the IP<sub>3</sub>R to step changes in [Ca<sup>2+</sup>] or [IP<sub>3</sub>], and we modify the Siekmann model to incorporate these dynamic data. We accomplish this by assuming that *q*<sub>24</sub> and *q*<sub>42</sub> are controlled by gating variables that evolve on different timescales, which can be determined from the data of Mak et al. without changing their steady-state properties, which are determined by the data of Siekmann et al. (16).

Incorporation of these dynamic properties does not change the stationary behavior of the IP<sub>3</sub>R model. Hence, the fact that *q*<sub>24</sub> and *q*<sub>42</sub> are saturating functions of [Ca<sup>2+</sup>], which was an important feature of the Siekmann model, is preserved in our new model.

It turns out that these dynamic data are in fact crucial for the proper behavior of puffs in the model; the original Siekmann model does not provide an adequate description of puff behavior.

It is important to note that this modification of the Siekmann model is not based on rigorous MCMC fits to the data of Mak et al. (13). Instead, we choose the gating

variables so as to give approximately correct distributions for the response to step changes of  $[\text{Ca}^{2+}]$ . It is left for future work to do rigorous MCMC fits to both the steady-state and dynamic data simultaneously. Full details of the new model are given in the [Supporting Material](#).

The transition rates  $q_{24}$  and  $q_{42}$  are given by

$$q_{24} = a_{24} + V_{24}(1 - m_{24}h_{24}), \quad (1)$$

$$q_{42} = a_{42} + V_{42}m_{42}h_{42}, \quad (2)$$

where  $m_{24}$ ,  $h_{24}$ ,  $m_{42}$ , and  $h_{42}$  are the gating variables that determine the values of  $q_{24}$  and  $q_{42}$ ;  $a_{24}$ ,  $a_{42}$ ,  $V_{24}$ , and  $V_{42}$  are either functions of  $[\text{IP}_3]$  or constants, and are given in the [Supporting Material](#).

We assume they obey the following differential equations:

$$\frac{dG}{dt} = \lambda_G(G_\infty - G), \quad (G = m_{24}, h_{24}, m_{42}, h_{42}), \quad (3)$$

where  $G_\infty$  is the equilibrium and  $\lambda_G$  is the rate at which the equilibrium is approached. The  $G_\infty$  are functions of  $[\text{Ca}^{2+}]$  and are given by the following:

$$m_{24_\infty} = \frac{c^{n_{24}}}{c^{n_{24}} + k_{24}^{n_{24}}}, \quad (4)$$

$$h_{24_\infty} = \frac{k_{-24}^{n_{-24}}}{c^{n_{-24}} + k_{-24}^{n_{-24}}}, \quad (5)$$

$$m_{42_\infty} = \frac{c^{n_{42}}}{c^{n_{42}} + k_{42}^{n_{42}}}, \quad (6)$$

$$h_{42_\infty} = \frac{k_{-42}^{n_{-42}}}{c^{n_{-42}} + k_{-42}^{n_{-42}}}, \quad (7)$$

where the  $n$ s and  $k$ s are functions of  $[\text{IP}_3]$  and are given in the [Supporting Material](#). We emphasize that there are purely heuristic fits, with no biophysical basis. Hence, we have

$$q_{24_\infty} = a_{24} + V_{24}(1 - m_{24_\infty}h_{24_\infty}), \quad (8)$$

$$q_{42_\infty} = a_{42} + V_{42}m_{42_\infty}h_{42_\infty}, \quad (9)$$

which are used to fit to stationary single channel data from (16). Results are shown in [Fig. S1](#) using a set of parameters given in the [Supporting Material](#). For the case of  $10 \mu\text{M}$   $\text{IP}_3$ , the MCMC method fails to work out convergent distributions of  $q$ s when  $[\text{Ca}^{2+}]$  is between 1 and  $\sim 50 \mu\text{M}$ , as the receptor is almost always in the drive mode so that very few mode switches can be detected (16). Therefore, for this range, we assume a saturated large  $q_{42}$  and a saturated small  $q_{24}$ .

The rates  $\lambda_{m_{24}}$ ,  $\lambda_{h_{24}}$ , and  $\lambda_{m_{42}}$  are constant, and are given in the [Supporting Material](#). However,  $\lambda_{h_{24}}$  is not well determined by the data of Mak et al. (13). This could be due to the simplicity of the model wherein only two modes are considered. On the other hand, it is also possible that some unusual modes mislead the estimation of  $\lambda_{h_{24}}$ , as the experiments in Mak et al. use a wider range of  $[\text{Ca}^{2+}]$  than that in Wagner and Yule (12) and Siekmann et al. (16), which constrain it to a physiological range. Because only two modes are unambiguously found by the MCMC methods (for the physiological range of  $[\text{Ca}^{2+}]$ ), we will not add any more states or modes to the Siekmann model. Instead, we shall estimate  $\lambda_{h_{24}}$  from puff data in Smith and Parker (30), in which it is found that most puffs exhibit fast increases from baseline to the peak, with sharp peaks instead of plateaus. This reveals that  $\text{IP}_3$ Rs are inhibited by high  $[\text{Ca}^{2+}]$  very quickly and are hard to reopen immediately, telling us that  $\lambda_{h_{24}}$  is relatively small for low  $[\text{Ca}^{2+}]$  but relatively large for high  $[\text{Ca}^{2+}]$ . Therefore, we model  $\lambda_{h_{24}}$  by the following:

$$\lambda_{h_{24}} = a_{h_{24}} + \frac{V_{h_{24}}c^7}{c^7 + 20^7}. \quad (10)$$

This is merely a heuristic way of modeling a stepwise rate that is low at low  $[\text{Ca}^{2+}]$  and high at high  $[\text{Ca}^{2+}]$ . Because we have no information about the exact concentration at which this transition occurs, we arbitrarily assume it to occur at  $20 \mu\text{M}$ . In addition, we choose  $V_{h_{24}} = 100 \text{ s}^{-1}$  to represent fast inhibition by  $\text{Ca}^{2+}$ . Because  $a_{h_{24}}$  dominates the recovery rate of an  $\text{IP}_3$ R inhibited by  $\text{Ca}^{2+}$ , and in turn has a significant effect on IPIs, we use it as a parameter instead of a constant to investigate how it alters the IPI distributions.

### Modeling $\text{Ca}^{2+}$ puffs using two different $\text{Ca}^{2+}$ concentrations

Rüdiger et al. (25) used two different  $[\text{Ca}^{2+}]$ s to model puffs: a high constant  $[\text{Ca}^{2+}]$  at each open channel mouth and a low average  $[\text{Ca}^{2+}]$  for all the closed channels. This method ignores  $\text{Ca}^{2+}$  diffusion and the spatial distribution of the  $\text{IP}_3$ Rs, and therefore dramatically increases the computational efficiency. Here, we apply the same idea to build our puff model. A detailed justification of this assumption is given in Rüdiger et al. (24,25) and Nguyen et al. (26).

Let  $c$  be the average low  $[\text{Ca}^{2+}]$  and let  $c_m$  be the  $[\text{Ca}^{2+}]$  at the  $\text{IP}_3$ R mouth. Before formulating the model, some assumptions need to be made:

- $\text{Ca}^{2+}$  fluxes through the plasma membrane do not influence  $\text{Ca}^{2+}$  puffs.
- The rate of  $\text{Ca}^{2+}$  release through single  $\text{IP}_3$ R is a constant. In other words, there is sufficiently high  $[\text{Ca}^{2+}]$  in the ER/SR to keep a nearly constant flux. Although local

depletion of the ER/SR is possible for some types of cells, it should not be the case for puffs observed in Dickinson et al. (18) and Smith and Parker (30), as  $[Ca^{2+}]$  can be kept at an elevated level when the channel is sustainedly open and the stepwise increments of those puffs do not get progressively smaller.

- The endogenous fast buffers are immobile, unsaturated, and in quasi-steady state. We have shown that relaxation of these assumptions does not qualitatively change the puff statistics, especially in some important aspects such as the IPI distribution and puff duration distribution (results not shown).
- The limited effect of endogenous slow buffers on puff dynamics is ignored. We also ignore the effect of EGTA, a slow buffer used in the experiments to isolate different puff sites by decreasing the effective  $Ca^{2+}$  diffusivity (30).

With these assumptions, the differential equations governing the dynamics of  $c$  are

$$\frac{dc}{dt} = J_{\text{increase}}N_o + J_{\text{leak}} - J_{\text{decrease}} - k_{\text{on}}(B_{\text{fluo4}} - b_{\text{fluo4}})c + k_{\text{off}}b_{\text{fluo4}}, \quad (11)$$

$$\frac{db_{\text{fluo4}}}{dt} = k_{\text{on}}(B_{\text{fluo4}} - b_{\text{fluo4}})c - k_{\text{off}}b_{\text{fluo4}}. \quad (12)$$

$J_{\text{increase}}$  is the  $Ca^{2+}$  flux contributing to the increase of  $c$ .  $J_{\text{decrease}}$  represents the flux (mainly via diffusion and sarcolemmal/endoplasmic reticulum  $Ca^{2+}$ -ATPase) removing  $Ca^{2+}$  from the puff site and is modeled by  $V_d c / (c + K_d)$ , where  $V_d$  and  $K_d$  are constants. In addition, a linear model of  $J_{\text{decrease}}$  with an appropriate conductance can also be used (result not shown).  $J_{\text{leak}}$  is  $Ca^{2+}$  leakage from the ER/SR, and is necessary for establishing a stable resting cytosolic  $[Ca^{2+}]$ . A  $Ca^{2+}$  dye (fluo-4) is added to the model, as all the experimental statistical analyses are done by using the fluorescence ratio instead of  $[Ca^{2+}]$ .  $B_{\text{fluo4}}$  and  $b_{\text{fluo4}}$  represent the total fluo-4 concentration and  $Ca^{2+}$ -bound fluo-4 concentration, respectively.

$N_o$  denotes the number of open  $IP_3R$ s and satisfies  $0 \leq N_o \leq N_{\text{IPR}}$  (total number of functional  $IP_3R$ s). It is computed by direct counting of the  $IP_3R$  states, and then is used to calculate  $c$  by integrating Eq. 11. To determine the state of each  $IP_3R$ , we use  $c_m$ , which is modeled by

$$c_m = c + c_h \delta, \quad (13)$$

where  $\delta$  indicates whether the  $IP_3R$  is open ( $\delta = 1$ ) or closed ( $\delta = 0$ ).  $c_h$  is the constant high  $[Ca^{2+}]$  at the receptor mouth.  $\delta$  is a stochastic variable that depends on  $c_m$  via the stochastic solution of the  $IP_3R$  model. All the parameter values are given in Table S2.

## Numerical methods

We solve Eqs. 11 and 12 in a deterministic way but apply a stochastic solver to the  $IP_3R$  dynamics. Eqs. 11 and 12 are solved by the fourth-order Runge–Kutta method. To solve the stochastic  $IP_3R$  model, a hybrid Gillespie method with adaptive timing is used to take into account the  $Ca^{2+}$  dependencies of transitions  $q_{24}$  and  $q_{42}$  (31). We choose a maximum time step size of  $10^{-4}$  s to guarantee the accuracy. In addition, the four differential equations in Eq. 3 are solved by the fourth-order Runge–Kutta method as well. All the numerical results are obtained using the software MATLAB (The MathWorks, Natick, MA).

## RESULTS

We focus on investigating how the puff statistics are influenced by the following three parameters:

- $[IP_3]$  ( $p$ ),
- recovery rate of an  $IP_3R$  from  $Ca^{2+}$  inhibition ( $a_{h_{24}}$ ), and
- the number of  $IP_3R$ s at a puff site ( $N_{\text{IPR}}$ )

as they are found experimentally to be important to the puff dynamics.

### Calcium puffs

Fig. 2 shows an example of simulated puff traces.  $F/F_0$  represents the ratio of  $b_{\text{fluo4}}$  to its resting value. We can see that a large puff usually needs openings of sufficiently many receptors. To investigate how puffs are initiated and terminated, we rescale the puff amplitude and plot it, together with  $m_{42}$  and  $h_{42}$ , in Fig. 3 ( $m_{42}$  and  $h_{42}$  are calculated by averaging over all the  $IP_3R$ s). In the lower panel of Fig. 3, we can see a “trigger” event at the beginning of the puff, which leads to a fast upstroke of the activation variable  $m_{42}$ , which then further increases the open probability of  $IP_3R$ s. This trigger event has been found experimentally (32). Termination of  $Ca^{2+}$  release is achieved when  $h_{42}$  gets close to zero. During the falling phase, open  $IP_3R$ s close randomly and independently with an average open time determined by  $m_{24}$  and  $h_{24}$  (results not shown), as they are hard to open again when  $h_{42}$  is very small. The slow recovery of  $h_{42}$ , which is due to the small value of  $a_{h_{42}}$  used, influences the average IPI and the next puff amplitude. This is investigated in the Supporting Material.

We can see in Fig. 2 that there are many small blips and other noise in the puff trace. To eliminate this noise, we choose puffs with amplitude larger than 3, that is,  $(F - F_0)/F_0 > 3$ . The choice of this value is based on the simulated blip amplitude distribution and the mean blip amplitude of 1.6. Details are given in the Supporting Material.

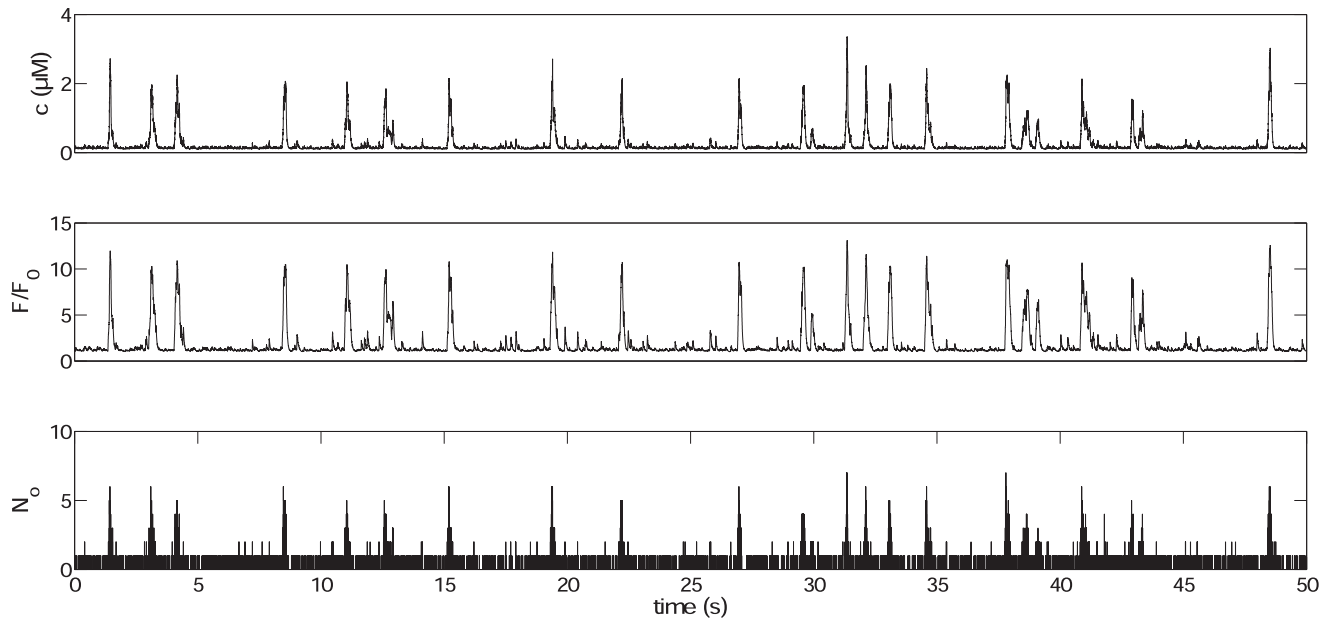

FIGURE 2 An example of simulation results of calcium puff traces. The *top panel* shows an example of the  $[\text{Ca}^{2+}]$  trace (variable  $c$  in Eq. 11).  $F/F_0$  represents the ratio of  $h_{\text{fluor4}}$  to its resting value. We set  $N_{\text{IPR}} = 10$ ,  $p = 0.2 \mu\text{M}$ , and  $a_{h_{42}} = 1 \text{ s}^{-1}$ .

### Dependence of IPI distribution on $a_{h_{42}}$

Experimental IPI distributions exhibit two different shapes, exponential and nonexponential (28). The former indicates that there is no (or very little) refractoriness during the

IPIs, whereas the latter implies an apparent refractory phase after each puff. A formula that gives excellent fits to experimental IPI distributions has been proposed by Thurley et al. (28) as follows:

$$P_{\text{IPI}} = \lambda(1 - e^{-\xi t})e^{[-\lambda t + \lambda(1 - e^{-\xi t})]/\xi}, \quad (14)$$

where  $\lambda$  is the puff rate, a measure of the typical IPI (similar to average puff frequency), and  $\xi$  is the recovery rate. This formula is derived based on the assumption that there is a refractory period after a puff. If  $\xi \gg \lambda$ , Eq. 14 can be reduced to a simple exponential distribution,

$$P_{\text{IPI}} = \lambda e^{-\lambda t}. \quad (15)$$

Refractoriness of simulated puffs comes from the slow recovery of  $h_{42}$  from inhibition by  $\text{Ca}^{2+}$ . This implies that varying  $a_{h_{42}}$  could change the duration of refractoriness and, in turn, change the shape of IPI distribution. This is confirmed by Fig. 4, which shows that increasing  $a_{h_{42}}$  from  $0.1 \text{ s}^{-1}$  to  $5 \text{ s}^{-1}$  leads to a change of the simulated IPI distribution from nonexponential to exponential. The details of the fits shown in Fig. 4 are given in Fig. S5, in which we can see that values for  $\lambda$  vary from  $0.1 \text{ s}^{-1}$  to  $0.5 \text{ s}^{-1}$  and values for  $\xi$  vary from  $0.5 \text{ s}^{-1}$  to  $2.2 \text{ s}^{-1}$ . These results are quantitatively consistent with the experimental ranges of  $\lambda$  and  $\xi$  found in SH-SY5Y cells, that from  $0.18 \text{ s}^{-1}$  to  $0.5 \text{ s}^{-1}$  for  $\lambda$  and from  $0.4 \text{ s}^{-1}$  to  $4 \text{ s}^{-1}$  for  $\xi$ . Moreover, it is also found that in HEK 293 cells, values for  $\lambda$  and  $\xi$  are in the ranges from  $0.5 \text{ s}^{-1}$  to  $3 \text{ s}^{-1}$  and from  $1 \text{ s}^{-1}$  to  $90 \text{ s}^{-1}$ , respectively (5,28).

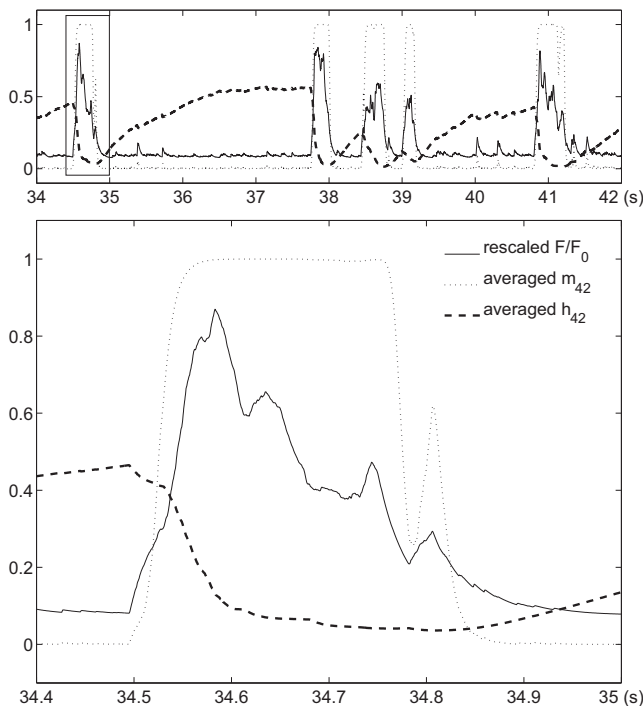

FIGURE 3 A close-up of some puffs in Fig. 2. The lower panel is an enlargement of the rectangular portion of the upper panel. The ratio  $F/F_0$  (solid curve) is rescaled into the interval  $[0,1]$  for ease of comparison with  $m_{42}$  and  $h_{42}$ .

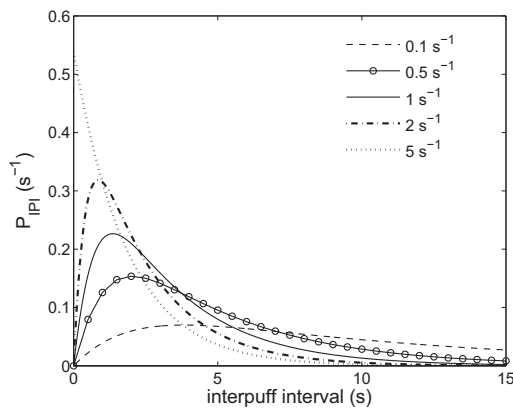

FIGURE 4 Various simulated IPI distributions for different  $a_{h42}$ . We set  $N_{IPR} = 10$ ,  $p = 0.1 \mu\text{M}$ . The values of  $a_{h42}$  are indicated in the legend. For a given  $a_{h42}$ , we choose appropriate values of  $\lambda$  and  $\xi$  to fit to the corresponding simulated IPI distributions using Eq. 14 or Eq. 15. Then the values of  $\lambda$  and  $\xi$  are used to plot these curves in the figure. Fitting details and results are given in the Supporting Material.

### Coefficient of variation is independent of $[\text{IP}_3]$

For a puff site, the IPI standard deviation has been shown to be linearly related to the IPI mean, regardless of  $[\text{IP}_3]$  (28). A qualitatively consistent result occurs in the model (Fig. 5), in which we plot the IPI standard deviation against the IPI mean. The coefficient of variation (CV) is defined as the ratio of the standard deviation to the mean of IPIs. When  $\text{CV} = 1$ , the IPI is a homogeneous Poisson process (the dashed line in Fig. 5), whereas when  $\text{CV} = 0$ , the IPI is a constant, giving an entirely periodic series of puffs. Other values of the CV between 0 and 1 indicate an inhomogeneous Poisson process with refractoriness. In our model, the CV is 0.79, which is in reasonable agreement with experimental values (that vary from 0.42 to 0.94 for different types of cells (28)). Therefore, the model result not only

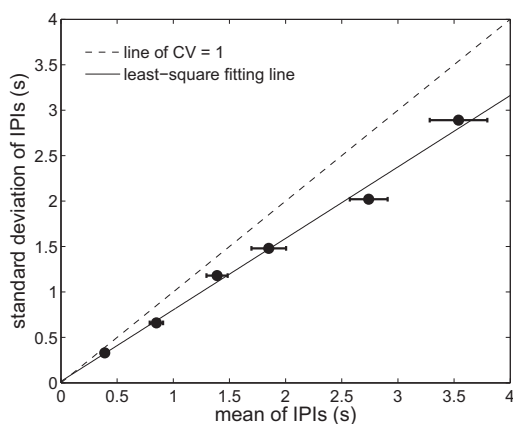

FIGURE 5 Relation of standard deviation and mean of IPI is linear and independent of  $[\text{IP}_3]$ . Six  $[\text{IP}_3]$ s, 0.05, 0.1, 0.15, 0.2, 0.3, and 0.5 ( $\mu\text{M}$ ), are used to generate the six points (from right to left), respectively. The points are expressed as mean  $\pm$  SE and are fit by a solid line with slope of 0.79 compared with the dashed line of  $\text{CV} = 1$ . We set  $N_{IPR} = 10$  and  $a_{h42} = 1 \text{ s}^{-1}$ .

confirms the nonexponential IPI distribution in Fig. 4, but also implies that a relatively slow recovery of  $\text{IP}_3\text{R}$  from  $\text{Ca}^{2+}$  inhibition could be a key mechanism of modulating IPI. We also find that changing the value of  $a_{h42}$  can vary the CV between 0.65 and 0.95. The relation is not very clear, as  $a_{h42}$  can also change some other statistics, such as average IPI and puff amplitude, which could in turn influence the CV. This is left for future work.

### Dependence of IPI on the number of $\text{IP}_3\text{Rs}$ at a puff site

It has been found experimentally and by model simulations that the IPI mean is a hyperbolic function of  $N_{IPR}$ , the number of  $\text{IP}_3\text{Rs}$  at a puff site (18). This implies a linear relationship between the IPI mean and  $1/N_{IPR}$ . This relationship is reproduced by our model (Fig. 6). Moreover, we find that varying  $[\text{IP}_3]$  changes the slope of the linear fit, but has little effect on the linearity of the relationship. We explain this as follows. If  $P_o$  is the probability per unit time for opening of a single channel at baseline, then  $N_{IPR}P_o$  is the probability per unit time for opening of one of the  $N_{IPR}$  channels. Hence, the average IPI is proportional to  $1/N_{IPR}P_o$ . Because a saturated low calcium sensitivity near the baseline of  $0.1 \mu\text{M}$  is assumed in the  $\text{IP}_3\text{R}$  model (Fig. S1),  $P_o$  is nearly a constant for  $[\text{Ca}^{2+}]$  close to baseline, which implies that the average IPI is simply proportional to  $1/N_{IPR}$ .

For small numbers of  $\text{IP}_3\text{R}$ , the model (Fig. 6) has longer IPIs than does the data (see Fig. 4E in Dickinson et al. (18)). There could be two reasons for this. One is that the applied  $[\text{IP}_3]$  is different. The other is that the cluster size estimated in the experiments is severely underestimated because of a very slow recovery rate (Fig. S6). For either of these reasons, the discrepancy can be easily fixed by changing model parameters.

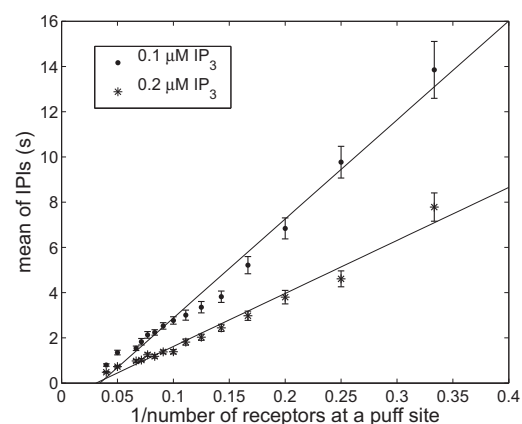

FIGURE 6 Linear relationship between mean of IPIs and  $1/N_{IPR}$ , the reciprocal of the number of  $\text{IP}_3\text{R}$  at a puff site.  $N_{IPR}$  is chosen to be 3 ~ 15, 20, and 25. For each value of  $N_{IPR}$ , means of IPIs for two different  $[\text{IP}_3]$ s,  $0.1 \mu\text{M}$  and  $0.2 \mu\text{M}$ , are computed and expressed as mean  $\pm$  SE. For each  $[\text{IP}_3]$ , a least-square linear fitting is performed and plotted using a solid line. We set  $a_{h42} = 1 \text{ s}^{-1}$ .

### The relationship between IPI and latency

Puff latency is defined to be the waiting time from addition of  $IP_3$  to the occurrence of the first puff (18). The biggest difference between IPI and latency is that the former could contain some inhibition effect from the preceding puff, whereas the latter definitely does not contain such an effect. Similar to Fig. 4D in Dickinson et al. (18), we plot the IPI mean and latency for different  $N_{IPR}$ s (Fig. 7), and find that they are linearly related with a slope of  $\sim 1.2$  and a positive IPI-axis intercept of  $\sim 0.35$  s (which are close to the slope of 1.1 and intercept of 0.35 s found experimentally). The intercept gives the average effective time of the inhibitory effect of the preceding puffs on the next IPI. The quantitative agreement between model results and experimental data shows that the preceding puff has a clear inhibitory effect on the occurrence of the next puff. Moreover, by investigating the dependence of puff amplitude on the preceding IPI (see the Supporting Material), we find that the inhibitory effect is time-dependent, which is also found experimentally (33).

### Dependence of puff amplitude on number of $IP_3$ Rs at a puff site

Fig. 8 shows the dependence of average puff amplitude and the largest puff amplitude (both normalized to mean blip amplitude) on the number of  $IP_3$ Rs at a puff site ( $N_{IPR}$ ). Both amplitudes increase as  $N_{IPR}$  increases. The average amplitude is linearly related to  $N_{IPR}$  for  $N_{IPR} < 12$ . However, when  $N_{IPR} \geq 12$ , it behaves like the square root of  $N_{IPR}$ . Because our model assumes that the rate of  $Ca^{2+}$  release through a single channel is a constant, we rule out ER/SR depletion as a reason for the nonlinearity. To check whether it is due to the nonlinear relation between  $Ca^{2+}$  and buffer,

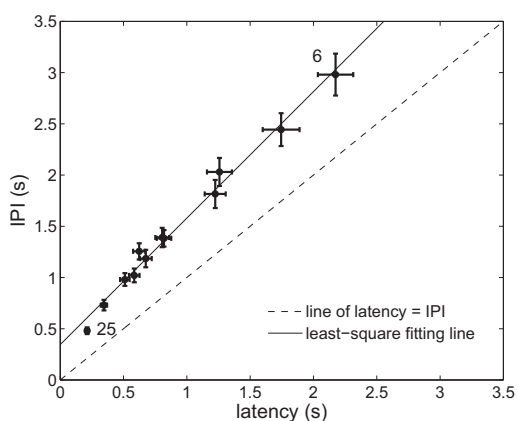

FIGURE 7 IPI is linearly dependent on puff latency.  $N_{IPR}$  is chosen to be 6 ~ 15, 20, and 25. Only are the points of 6 and 25  $IP_3$ R channels labeled. Small values of  $N_{IPR}$ , such as 3 ~ 5, are excluded in the figure for a better view because they will not change the linearity but significantly increase the scales of axes. Results are plotted as mean  $\pm$  SE and fit by the solid line. The dashed line indicates where IPI is equal to latency. We set  $p = 0.2$   $\mu$ M and  $a_{h_{42}} = 1$   $s^{-1}$ .

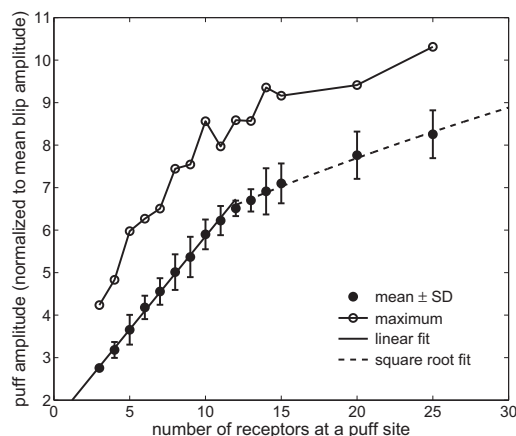

FIGURE 8 Dependence of average puff amplitude and the largest puff amplitude on the number of  $IP_3$ R at a puff site. Amplitudes are normalized to mean blip amplitude, 1.6. A linear fit is performed for  $N_{IPR} = 3 \sim 11$ , whereas a square root function gives an excellent fit to the points of  $N_{IPR} \geq 12$ . The average puff amplitude is expressed as mean  $\pm$  SD. We set  $p = 0.1$   $\mu$ M and  $a_{h_{42}} = 1$   $s^{-1}$ .

we plot the puff  $[Ca^{2+}]$  amplitude instead of the  $Ca^{2+}$ -bound buffer (Fig. S9) and find that the average puff  $[Ca^{2+}]$  amplitude is linearly dependent on  $N_{IPR}$ . This result shows that the nonlinear relation of puff amplitude and  $N_{IPR}$  in Fig. 8 is caused by using the  $Ca^{2+}$  buffer to indicate puff amplitude. Although no severe buffer saturation is observed, the nonlinearity of the buffering indicator inevitably affects the observed results, as the height of  $[Ca^{2+}]$  for large puffs can easily become higher than the dissociation constant of fluo-4 of 2  $\mu$ M.

Another important relationship obtained by combining Fig. 8 and Fig. S9 is that the average puff amplitude is nonlinearly related to the average maximum  $Ca^{2+}$  current in a similar way, as maximum  $Ca^{2+}$  current can be roughly assumed to be proportional to puff  $[Ca^{2+}]$  amplitude.

### Dependence of puff duration on the number of $IP_3$ Rs at a puff site

Experimental puffs usually exhibit a rapid increase to the peak but a relatively slow return to baseline (30). This property is also seen in the model (Fig. 9). As  $N_{IPR}$  increases, the average rise time gets saturated to  $\sim 130$  ms, whereas the average decay time keeps increasing linearly. This gives rise to an asymmetric puff shape for larger  $N_{IPR}$ . However, for smaller  $N_{IPR}$ , the two times are close to each other, which indicates that small puffs are relatively symmetric. The linear dependence of average decay time on the number of receptors is primarily a consequence of the fact that the  $IP_3$ Rs close randomly and independently (30). The saturation of rise time could be caused by two reasons. One is the puff amplitude saturation observed in Fig. 8. The other is that sufficient high average  $[Ca^{2+}]$  ( $c$ ) during  $Ca^{2+}$  release through a few initially activated channels prevents other

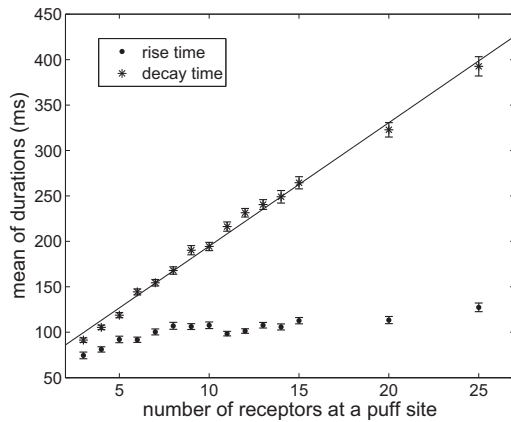

FIGURE 9 Puff rise time and decay time are differently dependent on the number of IP<sub>3</sub>R. Results are plotted as mean  $\pm$  SE. Points of decay time are fit linearly (solid line). We set  $p = 0.1 \mu\text{M}$  and  $a_{h_{42}} = 1 \text{ s}^{-1}$ .

closed channels from opening. The former seems not to be very convincing, as the amplitude saturation occurs when  $N_{\text{IPR}} = 12$ , whereas the rise time saturation takes place when  $N_{\text{IPR}}$  is only  $\sim 8$ . Hence, the latter is preferred to be a major reason for the phenomenon.

## DISCUSSION

Ca<sup>2+</sup> puffs are local transient Ca<sup>2+</sup> release events from internal Ca<sup>2+</sup> stores such as the ER or the SR through a cluster of open IP<sub>3</sub>Rs. For a better understanding of the mechanisms underlying this physiological phenomenon, we first construct a new mathematical model of the IP<sub>3</sub>R, based mostly on the Siekmann IP<sub>3</sub>R model (16), but also incorporating the time-dependent data of Mak et al. (13). By construction, we know that our new model fits the stationary data equally as well as the original Siekmann model. It merely has additional time-dependencies to allow for the correct transient behavior. We then show how our model qualitatively and quantitatively reproduces experimentally observed puff statistics. The most important feature of our model is that the IP<sub>3</sub>R can recover from inhibition by Ca<sup>2+</sup> only on a relatively slow timescale. This timescale cannot be identified from the stationary data of Siekmann et al., but depends on the nonstationary data of Mak et al.

This is an important point worth emphasizing. We know (theoretically) that a sufficiently long experimental trace will contain information about the behavior of the IP<sub>3</sub>R on both long and short timescales, and thus will be sufficient to determine both steady-state and transient behavior. However, the reality is more complex. In practice, such long traces are not obtainable, and, even if they were, fitting to the data would require unrealistically large amounts of computer time because of the rarity of the slow transitions. Thus, fitting the stationary data alone will determine only some of the important receptor properties.

Interestingly, it turns out that the slow processes are vital for controlling the inhibition of the IP<sub>3</sub>R; thus, puffs do not occur often enough (in the stationary state) to be characterized by stationary data using our methods.

There are thus two options. The first option would be to incorporate nonstationary data (i.e., the responses to steps of [IP<sub>3</sub>] and/or [Ca<sup>2+</sup>]) into the full fitting process, and thereby construct an extended Markov model, with more than the present 6 states. One would then continue to include additional states until the MCMC fits to the data indicated that additional states were unnecessary or that the additional rate constants could not be unambiguously determined. Ullah et al. (15) took an approach similar to this (although their method of fitting to data is different from that of Siekmann et al. (16)), constructing a Markov model with 12 states. However, the model of Ullah et al. cannot successfully reproduce calcium puffs. This failure is primarily due to lack of an effective transition from the inactivated state to the resting state, without which transition the receptors lose the excitability that is crucial for generating repetitive puffs and waves.

The second option, which we took, is to construct a hybrid model, partaking both of the nature of Markov models (such as the De Young–Keizer model) and of heuristic models (such as the Atri model). This has the advantage that we need not introduce any additional states into the Markov model, but it has the disadvantage that the time-dependent transitions we introduce have no biophysical basis. However, we have lost less than one might think. It is highly unlikely that an actual IP<sub>3</sub>R exists in exactly 6 states (or even 60 states), with well-defined transitions between them. In general, it is thus more accurate to interpret Markov models as useful descriptions rather than as exact biophysical reality, in which case a hybrid Markov/heuristic model is just as useful.

Finally, we note that although the new model still does not reproduce every aspect of the nonstationary data (i.e., it does not reproduce multimodal waiting time distributions), it still captures the most important features of the dynamic data by reproducing the most dominant modes of those distributions.

The hybrid nature of our model raises some interesting questions. Which part of our model is primarily responsible for the puff dynamics? We know that the Markov model, with time-independent rate constants, does not provide an adequate description of puff dynamics. This is why we introduced the heuristic time dependencies in the first place. However, can the Markov model skeleton be replaced by a simpler model (most likely with the incorrect stationary behavior) as long as the heuristic time dependencies are retained?

We can answer only some of these questions. For example, one implication of Fig. 4 is that the original Siekmann IP<sub>3</sub>R model (that fits only to stationary single-channel data) cannot be used to reproduce the nonexponential IPI



distributions. In Eq. 3, if  $\lambda_G$  is sufficiently larger than the average change velocity of  $c$ ,  $G$  can be reasonably assumed to follow its equilibrium at any time. Thus,  $m_{42}$ ,  $m_{24}$ , and  $h_{24}$  evolve nearly as their equilibria, whereas  $h_{42}$  evolves on a much slower timescale indicated by a small value of  $a_{h_{42}}$ . As  $a_{h_{42}}$  increases, the evolution of  $h_{42}$  becomes closer to its equilibrium. However, a consequence of this change is that the feature of the nonexponential IPI distribution gradually disappears and becomes closer to an exponential distribution. This implies that the inhomogeneity of the occurrence of puffs is primarily caused by the slow recovery of  $h_{42}$ . Therefore, assuming that the IP<sub>3</sub>R can instantaneously follow the steady state cannot reproduce results that fully explain the experimental data, which confirms the necessity of introducing a relatively slow recovery rate  $a_{h_{42}}$ .

However, we do not yet know the simplest possible version of our model that can generate correct IPI distributions or other puff statistics. Preliminary results indicate that the modal nature of the IP<sub>3</sub>R plays little role in the dynamics of puffs and can thus reasonably be ignored in studies of periodic Ca<sup>2+</sup> waves. In this case, the simplest Markov scheme is just a two-state open/closed model, with time-dependent transitions. However, a complete study of this question is well beyond the scope of this article and is left for future work.

A major assumption in our model is that  $\lambda_{h_{42}}$  is heuristically modeled by Eq. 10 wherein an important parameter,  $a_{h_{42}}$ , is introduced to indicate the recovery rate of a single IP<sub>3</sub>R from inhibition by Ca<sup>2+</sup>. This assumption is based on the appearance and statistics of observed puffs, rather than on nonstationary single-channel data in Mak et al. (13), because a relatively long (~2.4 s) recovery time given by the data in Mak et al. cannot be achieved otherwise by our model. The failure is mainly due to the saturation of  $q_{42}$  curves for high [Ca<sup>2+</sup>], as seen in Fig. S1b. To resolve the problem, we need to consider two aspects. One is whether the stationary single-channel data support a smaller value of  $q_{42}$  for 300  $\mu$ M [Ca<sup>2+</sup>]. The other is whether [Ca<sup>2+</sup>] at the channel mouth during Ca<sup>2+</sup> release can reach 300  $\mu$ M. The former needs more stationary data, whereas the latter is still not clearly known. If [Ca<sup>2+</sup>] can reach 300  $\mu$ M, then we need to modify the existing model, especially the values of  $q_{42}$  for high [Ca<sup>2+</sup>]. But if [Ca<sup>2+</sup>] can only reach ~100  $\mu$ M, the dynamic data for 300  $\mu$ M are not sufficient to reveal the actual recovery rate. Because of this uncertainty, we use Eq. 10 as an alternative way of modeling the slow recovery process.

Our new model is, to our knowledge, the first to reproduce, simultaneously, the correct statistics of IP<sub>3</sub>R opening and closing, as well as the correct puff statistics. Although most of the model results, like Figs. 5–9, could qualitatively be reproduced by some older models (18,20–27), none of these older models demonstrate the correct IP<sub>3</sub>R statistical behavior. In addition, our model demonstrates that slow

recovery of an IP<sub>3</sub>R from Ca<sup>2+</sup> inhibition is a crucial feature for Ca<sup>2+</sup> puffs, and shows also how the IPI distribution is affected by the recovery rate (Fig. 4). We find that various IPI distributions (either exponential or nonexponential, both of which are seen experimentally (28)) obtained by varying the recovery rate,  $a_{h_{42}}$ , reveal that different puff sites could exhibit different average recovery rates. In addition, we also find that puff amplitude initially increases but then becomes saturated as  $a_{h_{42}}$  increases (Fig. S6). This suggests that the number of IP<sub>3</sub>Rs at a puff site could be severely underestimated if the average recovery process is sufficiently slow.

We investigate the relation of puff amplitude and IPI in the Supporting Material (Fig. S8), based on which we find that a saturation in Fig. S8 occurs at about  $1/a_{h_{42}}$ . This could be a way of estimating  $a_{h_{42}}$  from experimental data. In addition, we find the following IPI seems to be independent on the preceding puff amplitude by looking at the scatterplot similar to Fig. S7 (results not shown). This could be explained by Fig. 3, in which we can see that the inactivation variable  $h_{42}$  will quickly drop to be very close to zero during a puff regardless of the puff amplitude. Therefore, the inhibitory effect from preceding puffs with various amplitudes on the following IPIs is nearly identical.

Puff amplitude has been reported to be nonlinearly related to the maximum Ca<sup>2+</sup> current such that, as maximum Ca<sup>2+</sup> current increases, puff amplitude initially increases linearly but then becomes proportional to the square root of maximum Ca<sup>2+</sup> current (19,34,35). Our model gives the same result. Thurley et al. (19) suggested that the nonlinearity is due to local Ca<sup>2+</sup> depletion in the ER/SR. However, this conclusion was challenged by Solovey et al. (35), who showed that this nonlinearity could be generated by a mean field model or by using a stochastic model with a constant single-channel Ca<sup>2+</sup> flux. They also concluded that the nonlinear relation was due to the dynamics of the Ca<sup>2+</sup>-bound dye. By comparing the nonlinear relation between average puff amplitude and the number of IP<sub>3</sub>Rs (Fig. 8) and the linear relation between average puff [Ca<sup>2+</sup>] amplitude and the number of IP<sub>3</sub>Rs (Fig. S9), our model supports the conclusion of Solovey et al. by showing that nonlinearity arises from the nonlinear relationship between [Ca<sup>2+</sup>] and Ca<sup>2+</sup>-bound buffer concentration, even when Ca<sup>2+</sup>-bound buffer is not saturated.

Ca<sup>2+</sup> oscillations and waves usually exhibit a relatively long decay time and periods ranging from a few seconds to a few minutes. The mechanisms underlying long-period waves remain unclear; this is perhaps the most important unsolved problem in the theoretical study of Ca<sup>2+</sup> waves. One can obtain stochastically generated long-period waves in models that do not have the correct puff statistics, but there is as yet no model that has the correct IP<sub>3</sub>R statistics and the correct puff statistics and can generate long-period waves. Our own preliminary computations indicate that our new model can generate short-period waves (around a

few seconds) but not waves of longer period. However, we leave a detailed study of this question for a future article.

## SUPPORTING MATERIAL

Nine figures and two tables are available at [http://www.biophysj.org/biophysj/supplemental/S0006-3495\(13\)00856-4](http://www.biophysj.org/biophysj/supplemental/S0006-3495(13)00856-4).

## REFERENCES

- Berridge, M. J. 1997. Elementary and global aspects of calcium signaling. *J. Physiol.* 499:291–306.
- Berridge, M. J., P. Lipp, and M. D. Bootman. 2000. The versatility and universality of calcium signalling. *Nat. Rev. Mol. Cell Biol.* 1:11–21.
- Keener, J. P., and J. Sneyd. 2009. *Mathematical Physiology*. Springer-Verlag, New York.
- Bergner, A., and M. J. Sanderson. 2002. Acetylcholine-induced calcium signaling and contraction of airway smooth muscle cells in lung slices. *J. Gen. Physiol.* 119:187–198.
- Thurley, K., A. Skupin, ..., M. Falcke. 2012. Fundamental properties of  $\text{Ca}^{2+}$  signals. *Biochim. Biophys. Acta.* 1820:1185–1194.
- De Young, G. W., and J. Keizer. 1992. A single-pool inositol 1,4,5-trisphosphate-receptor-based model for agonist-stimulated oscillations in  $\text{Ca}^{2+}$  concentration. *Proc. Natl. Acad. Sci. USA.* 89:9895–9899.
- Atri, A., J. Amundson, ..., J. Sneyd. 1993. A single-pool model for intracellular calcium oscillations and waves in the *Xenopus laevis* oocyte. *Biophys. J.* 65:1727–1739.
- Bezprozvanny, I., J. Watras, and B. E. Ehrlich. 1991. Bell-shaped calcium-response curves of  $\text{ins}(1,4,5)\text{P}_3$ - and calcium-gated channels from endoplasmic reticulum of cerebellum. *Nature.* 351:751–754.
- Sneyd, J., M. Falcke, ..., C. Fox. 2004. A comparison of three models of the inositol trisphosphate receptor. *Prog. Biophys. Mol. Biol.* 85:121–140.
- Sneyd, J., and M. Falcke. 2005. Models of the inositol trisphosphate receptor. *Prog. Biophys. Mol. Biol.* 89:207–245.
- Foskett, J. K., C. White, ..., D. O. D. Mak. 2007. Inositol trisphosphate receptor  $\text{Ca}^{2+}$  release channels. *Physiol. Rev.* 87:593–658.
- Wagner, L. E., and D. I. Yule. 2011. Differential regulation of the inositol 1,4,5-trisphosphate receptor type-1 and -2 single channel properties by  $\text{InsP}_3$ ,  $\text{Ca}^{2+}$  and ATP. *J. Physiol.* <http://jp.physoc.org/content/early/2012/04/30/jphysiol.2012.228320>. Abstract.
- Mak, D. O. D., J. E. Pearson, ..., J. K. Foskett. 2007. Rapid ligand-regulated gating kinetics of single inositol 1,4,5-trisphosphate receptor  $\text{Ca}^{2+}$  release channels. *EMBO Rep.* 8:1044–1051.
- Gin, E., M. Falcke, ..., J. Sneyd. 2009. A kinetic model of the inositol trisphosphate receptor based on single-channel data. *Biophys. J.* 96:4053–4062.
- Ullah, G., D. O. D. Mak, and J. E. Pearson. 2012. A data-driven model of a modal gated ion channel: the inositol 1,4,5-trisphosphate receptor in insect Sf9 cells. *J. Gen. Physiol.* 140:159–173.
- Siekman, I., L. E. Wagner, 2nd, ..., J. Sneyd. 2012. A kinetic model for type I and II  $\text{IP}_3\text{R}$  accounting for mode changes. *Biophys. J.* 103:658–668.
- Shuai, J., H. J. Rose, and I. Parker. 2006. The number and spatial distribution of  $\text{IP}_3$  receptors underlying calcium puffs in *Xenopus* oocytes. *Biophys. J.* 91:4033–4044.
- Dickinson, G. D., D. Swaminathan, and I. Parker. 2012. The probability of triggering calcium puffs is linearly related to the number of inositol trisphosphate receptors in a cluster. *Biophys. J.* 102:1826–1836.
- Thul, R., and M. Falcke. 2004. Release currents of  $\text{IP}_3$  receptor channel clusters and concentration profiles. *Biophys. J.* 86:2660–2673.
- Swaminathan, D., G. Ullah, and P. Jung. 2009. A simple sequential-binding model for calcium puffs. *Chaos.* 19:037109.
- Shuai, J., J. E. Pearson, ..., I. Parker. 2007. A kinetic model of single and clustered  $\text{IP}_3$  receptors in the absence of  $\text{Ca}^{2+}$  feedback. *Biophys. J.* 93:1151–1162.
- Solovey, G., D. Fraiman, ..., S. Ponce Dawson. 2008. Simplified model of cytosolic  $\text{Ca}^{2+}$  dynamics in the presence of one or several clusters of  $\text{Ca}^{2+}$ -release channels. *Phys. Rev. E Stat. Nonlin. Soft Matter Phys.* 78:041915.
- Higgins, E. R., H. Schmidle, and M. Falcke. 2009. Waiting time distributions for clusters of  $\text{IP}_3$  receptors. *J. Theor. Biol.* 259:338–349.
- Rüdiger, S., J. W. Shuai, and I. M. Sokolov. 2010. Law of mass action, detailed balance, and the modeling of calcium puffs. *Phys. Rev. Lett.* 105:048103.
- Rüdiger, S., P. Jung, and J. W. Shuai. 2012. Termination of  $\text{Ca}^{2+}$  release for clustered  $\text{IP}_3\text{R}$  channels. *PLoS Comput. Biol.* 8:e1002485.
- Nguyen, V., R. Mathias, and G. D. Smith. 2005. A stochastic automata network descriptor for Markov chain models of instantaneously coupled intracellular  $\text{Ca}^{2+}$  channels. *Bull. Math. Biol.* 67:393–432.
- Ullah, G., I. Parker, ..., J. E. Pearson. 2012. Multi-scale data-driven modeling and observation of calcium puffs. *Cell Calcium.* 52:152–160.
- Thurley, K., I. F. Smith, ..., M. Falcke. 2011. Timescales of  $\text{IP}_3$ -evoked  $\text{Ca}(2+)$  spikes emerge from  $\text{Ca}(2+)$  puffs only at the cellular level. *Biophys. J.* 101:2638–2644.
- Siekman, I., L. E. Wagner, 2nd, ..., J. Sneyd. 2011. MCMC estimation of Markov models for ion channels. *Biophys. J.* 100:1919–1929.
- Smith, I. F., and I. Parker. 2009. Imaging the quantal substructure of single  $\text{IP}_3\text{R}$  channel activity during  $\text{Ca}^{2+}$  puffs in intact mammalian cells. *Proc. Natl. Acad. Sci. USA.* 106:6404–6409.
- Rüdiger, S., J. W. Shuai, ..., M. Falcke. 2007. Hybrid stochastic and deterministic simulations of calcium blips. *Biophys. J.* 93:1847–1857.
- Rose, H. J., S. Dargan, ..., I. Parker. 2006. “Trigger” events precede calcium puffs in *Xenopus* oocytes. *Biophys. J.* 91:4024–4032.
- Fraiman, D., B. Pando, ..., S. P. Dawson. 2006. Analysis of puff dynamics in oocytes: interdependence of puff amplitude and interpuff interval. *Biophys. J.* 90:3897–3907.
- Bruno, L., G. Solovey, ..., S. P. Dawson. 2010. Quantifying calcium fluxes underlying calcium puffs in *Xenopus laevis* oocytes. *Cell Calcium.* 47:273–286.
- Solovey, G., D. Fraiman, and S. P. Dawson. 2011. Mean field strategies induce unrealistic non-linearities in calcium puffs. *Front. Physiol.* 2:46.

# Supporting Material for “A stochastic model of calcium puffs based on single channel data”

Pengxing Cao<sup>1</sup>, Graham Donovan<sup>1</sup>, Martin Falcke<sup>2</sup>, and James Sneyd\*<sup>1</sup>

<sup>1</sup>Department of Mathematics, The University of Auckland, Auckland, New Zealand

<sup>2</sup>Mathematical Cell Physiology, Max Delbrück Center for Molecular Medicine, Berlin, Germany

---

\*Correspondence: [sneyd@math.auckland.ac.nz](mailto:sneyd@math.auckland.ac.nz)

# Contents

The supporting material contains the following:

- Summary of equations and parameters of the IP<sub>3</sub>R model
- Parameter values of the puff model
- Estimations of  $\lambda_{m_{24}}$ ,  $\lambda_{h_{24}}$ ,  $\lambda_{m_{42}}$  and  $\lambda_{h_{42}}$  based on non-stationary single channel data
- Statistics of calcium blips
- Interpuff interval distributions for various  $a_{h_{42}}$
- Dependence of puff amplitude on  $a_{h_{42}}$
- Dependence of puff amplitude on IPI
- Dependence of puff [Ca<sup>2+</sup>] amplitude on the number of IP<sub>3</sub>Rs at a puff site

## Summary of equations and parameters of the IP<sub>3</sub>R model

In the main text, we have introduced the Siekmann IP<sub>3</sub>R model which is a 6-state Markov model derived from stationary single channel data (see Fig. 1). All the rates of state-transition are constants (given in Table S1) except  $q_{24}$  and  $q_{42}$  which are Ca<sup>2+</sup>-/IP<sub>3</sub>-dependent and connecting the park mode and the drive mode (1). We formulate  $q_{24}$  and  $q_{42}$  as

$$q_{24} = a_{24} + V_{24}(1 - m_{24}h_{24}), \quad (\text{S1})$$

$$q_{42} = a_{42} + V_{42}m_{42}h_{42}, \quad (\text{S2})$$

where  $m_{24}$ ,  $h_{24}$ ,  $m_{42}$  and  $h_{42}$  are the Ca<sup>2+</sup>-/IP<sub>3</sub>-modulated “gating variables”.  $a_{24}$ ,  $a_{42}$ ,  $V_{24}$  and  $V_{42}$  are either functions of IP<sub>3</sub> concentration ( $p$ , in unit of  $\mu\text{M}$ ) or constants and are given later. We assume those “gating variables” obey the following differential equations,

$$\frac{dG}{dt} = \lambda_G(G_\infty - G), \quad (G = m_{24}, h_{24}, m_{42}, h_{42}), \quad (\text{S3})$$

where  $G_\infty$  is the equilibrium and  $\lambda_G$  is the rate at which the equilibrium is approached. Those equilibria are functions of [Ca<sup>2+</sup>] ( $c$ , in unit of  $\mu\text{M}$ ), and are modeled by

$$m_{24\infty} = \frac{c^{n_{24}}}{c^{n_{24}} + k_{24}^{n_{24}}}, \quad (\text{S4})$$

$$h_{24\infty} = \frac{k_{-24}^{n-24}}{c^{n-24} + k_{-24}^{n-24}}, \quad (\text{S5})$$

$$m_{42\infty} = \frac{c^{n_{42}}}{c^{n_{42}} + k_{42}^{n_{42}}}, \quad (\text{S6})$$

$$h_{42\infty} = \frac{k_{-42}^{n-42}}{c^{n-42} + k_{-42}^{n-42}}. \quad (\text{S7})$$

Hence, we have

$$q_{24\infty} = a_{24} + V_{24}(1 - m_{24\infty}h_{24\infty}), \quad (\text{S8})$$

$$q_{42\infty} = a_{42} + V_{42}m_{42\infty}h_{42\infty}. \quad (\text{S9})$$

The expressions of  $a_s$ ,  $V_s$ ,  $n_s$  and  $k_s$  are chosen as follows so that Eq. S8 and Eq. S9 give good fits to the experimental values of  $q_{24}$  and  $q_{42}$  shown in Fig. S1,

$$\begin{aligned} V_{24} &= 60 + 437/(p^3 + 1.73), & a_{24} &= 1 + 7.5/(p^2 + 0.25), \\ V_{42} &= 100, & a_{42} &= 1.8p^2/(p^2 + 0.34), \\ n_{24} &= 6.3 + 1.72p^2/(p^2 + 1.44), & k_{24} &= 0.48 + 0.1/(p^2 + 1.44), \\ n_{-24} &= 8.2p^2/(p^2 + 2.25), & k_{-24} &= 79.75 + 25/(p^2 + 1.44), \\ n_{42} &= 5.9 + 7.6/(p^2 + 1.44), & k_{42} &= 0.4 + 0.26p^4/(p^4 + 168), \\ n_{-42} &= 3.2 + 4.88p^2/(p^2 + 1.69), & k_{-42} &= 0.17 + 70p^3/(p^3 + 274.6). \end{aligned}$$

| Parameter | Value/Units           | Parameter | Value/Units          |
|-----------|-----------------------|-----------|----------------------|
| $q_{12}$  | 1240 s <sup>-1</sup>  | $q_{21}$  | 88 s <sup>-1</sup>   |
| $q_{23}$  | 3 s <sup>-1</sup>     | $q_{32}$  | 69 s <sup>-1</sup>   |
| $q_{26}$  | 10500 s <sup>-1</sup> | $q_{62}$  | 4010 s <sup>-1</sup> |
| $q_{45}$  | 11 s <sup>-1</sup>    | $q_{54}$  | 3330 s <sup>-1</sup> |

TABLE S1: All the transition rates in the Siekmann model except  $q_{24}$  and  $q_{42}$  (1).

## Parameter values of the puff model

Parameter values of the puff model (Eqs. 11–13 in the main text) are given in Table S2.

## Estimations of $\lambda_{m_{24}}$ , $\lambda_{h_{24}}$ , $\lambda_{m_{42}}$ and $\lambda_{h_{42}}$ based on non-stationary single channel data

The rates  $\lambda_{m_{24}}$ ,  $\lambda_{h_{24}}$  and  $\lambda_{m_{42}}$  in Eq. S3 are evaluated based on the non-stationary single channel data from (4) wherein latency distributions of mode-switch of an IP<sub>3</sub>R in response to a sudden step change of [Ca<sup>2+</sup>] are measured. Considering the data and the IP<sub>3</sub>R model together, we can easily see that different changes of [Ca<sup>2+</sup>] actually reveal different values of the  $\lambda$ s. For example, A step increase of [Ca<sup>2+</sup>] from 10 nM to 2  $\mu$ M leads to a mode switch of an IP<sub>3</sub>R

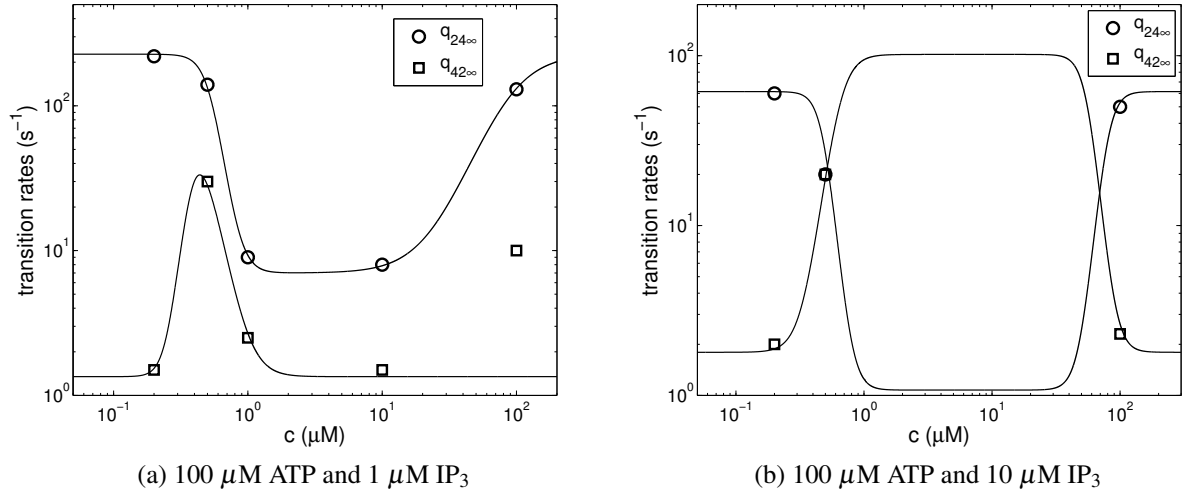

FIGURE S1: Stationary transition rates,  $q_{24}$  and  $q_{42}$ , as functions of  $[\text{Ca}^{2+}]$ . Circles and squares represent the means of  $q_{24}$  and  $q_{42}$  distributions computed by MCMC simulation (also see (1)). The corresponding fitting curves are produced using Eqs. S4 – S9.

| Parameter             | Value/Units                           | Parameter        | Value/Units                                |
|-----------------------|---------------------------------------|------------------|--------------------------------------------|
| $c_0$                 | 0.1 $\mu\text{M}$                     | $V_d$            | 4000 $\mu\text{M} \cdot \text{s}^{-1}$     |
| $J_{\text{increase}}$ | 200 $\mu\text{M} \cdot \text{s}^{-1}$ | $K_d$            | 12 $\mu\text{M}$                           |
| $J_{\text{leak}}$     | 33 $\mu\text{M} \cdot \text{s}^{-1}$  | $k_{\text{on}}$  | 150 $\mu\text{M}^{-1} \cdot \text{s}^{-1}$ |
| $B_{\text{fluo4}}$    | 20 $\mu\text{M}$                      | $k_{\text{off}}$ | 300 $\text{s}^{-1}$                        |
| $c_h$                 | 120 $\mu\text{M}$                     |                  |                                            |

TABLE S2: Parameter values for Eqs. 11–13 in the main text. Parameters relating to fluo-4 are obtained from (2). Resting  $[\text{Ca}^{2+}]$ ,  $c_0$ , is set to be a typical value of 0.1  $\mu\text{M}$ .  $c_h$  is obtained from (3). The remainder of the parameters are determined by requiring physiologically realistic simulations.

from the park mode (or some undetected inactivation mode, as no stationary single channel data at 10 nM  $[\text{Ca}^{2+}]$  is provided) to the drive mode. During the process, activation latency is solely influenced by the activation of  $m_{42}$  (as  $h_{42}$  is nearly constant in this range of  $[\text{Ca}^{2+}]$ ), which therefore tells us that the value of  $\lambda_{m_{42}}$  could be roughly estimated if we can generate a simulated latency distribution in good agreement with the experimental data. Fig. S2a shows the activation latency histogram using  $\lambda_{m_{42}} = 100 \text{ s}^{-1}$ . It exhibits a good agreement on the range and the location of the peak with the experimental histogram in (4) except showing a smaller dispersion.

Similarly,  $\lambda_{m_{24}}$  and  $\lambda_{h_{24}}$  are roughly estimated to be 100  $\text{s}^{-1}$  and 40  $\text{s}^{-1}$  using Fig. S2b and Fig. S2c respectively. We note that experimental latency histogram for  $\lambda_{h_{24}}$  clearly contains more than one peak which the current two-mode IP<sub>3</sub>R model cannot achieve. To make sure

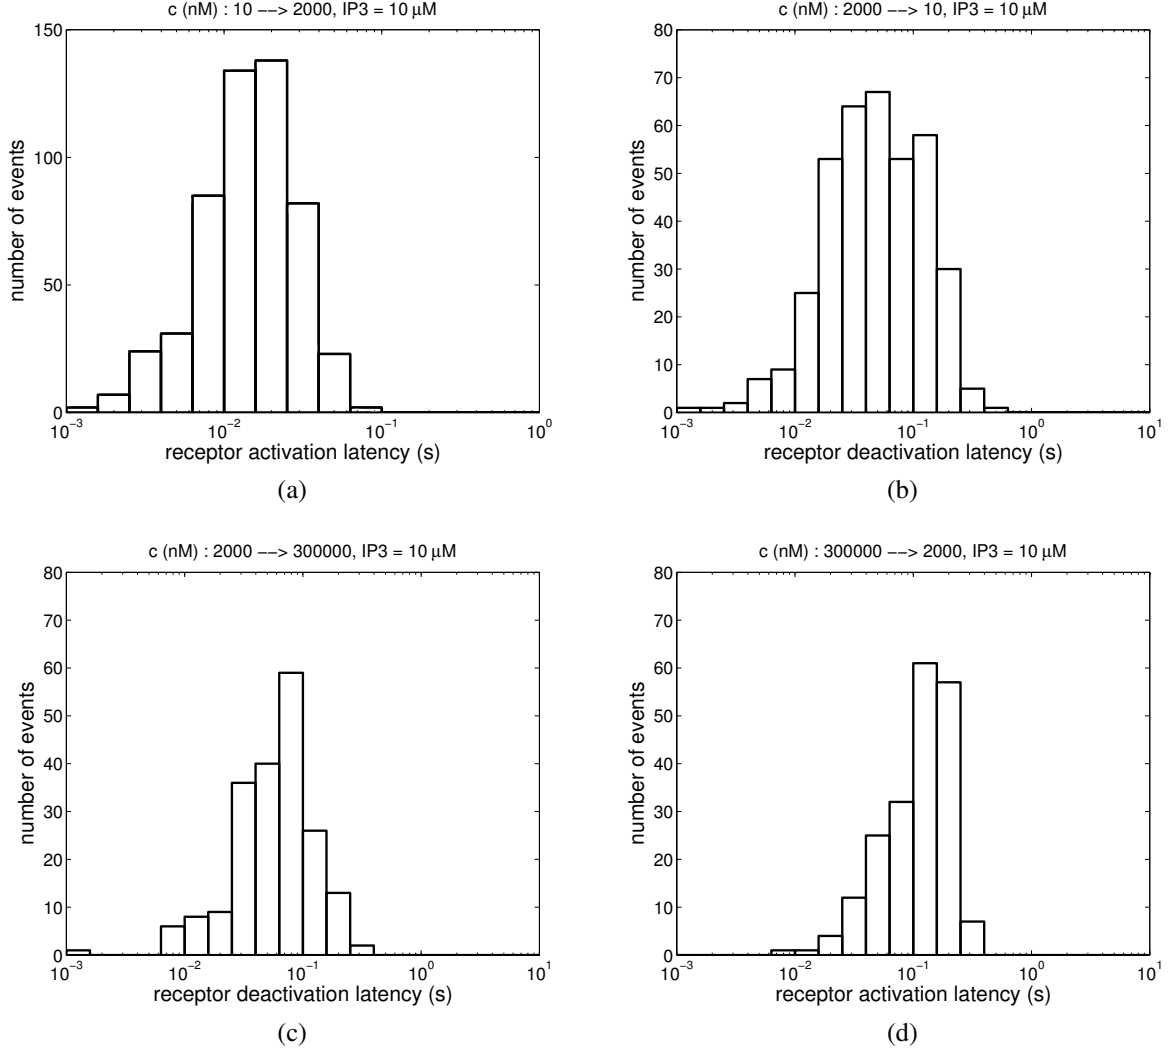

FIGURE S2: Simulated latency histograms for different step changes of  $[\text{Ca}^{2+}]$  labelled in the titles of the subfigures. We set  $p = 10 \mu\text{M}$ . As mentioned in the main text, the  $\text{IP}_3\text{R}$  model is built at  $100 \mu\text{M}$  ATP. However in the experiments  $500 \mu\text{M}$  ATP is used (4). Here we assume the difference in  $[\text{ATP}]$  does not contribute significantly changes to  $q_{24\infty}$  and  $q_{42\infty}$ , and therefore can be ignored.

the  $\text{IP}_3\text{R}$  model captures the most dominant feature, we only consider the largest peak and use it to estimate  $\lambda_{h_{24}}$ . Possible reasons for explaining the multimodal distribution could be mode changes caused by randomness of  $\text{IP}_3$  binding or unbinding or the existence of some undetected inactivation modes at such a high  $[\text{Ca}^{2+}]$  of  $300 \mu\text{M}$  (which is beyond the range used to get the stationary single channel data (1)).

The estimation of  $\lambda_{h_{42}}$  is unsuccessful, as no value can give an acceptable histogram comparable to the experimental data (see Fig. S2d). The possible reasons have been discussed in the main text. Therefore based on puff data from (5), we propose a model of  $\lambda_{h_{42}}$  to be

$$\lambda_{h_{42}} = a_{h_{42}} + \frac{V_{h_{42}}c^7}{c^7 + 20^7}, \quad (\text{S10})$$

We choose  $V_{h_{42}} = 100 \text{ s}^{-1}$  to represent a fast  $\text{Ca}^{2+}$ -inhibition.  $a_{h_{42}}$  is considered to be a parameter instead of a constant to investigate its effect on IPI distributions (see Fig. 4 in the main text).

## Statistics of calcium blips

In our puff model, by letting  $N_{IPR} = 1$ , we can simulate blips and their statistics. Similar to IPI, interblip interval (IBI) is the waiting time between successive blips. Fig. S3a shows the IBI distribution is almost an exponential, demonstrating that average recovery time of an  $IP_3R$  from self-inhibition is far shorter than average IBI.

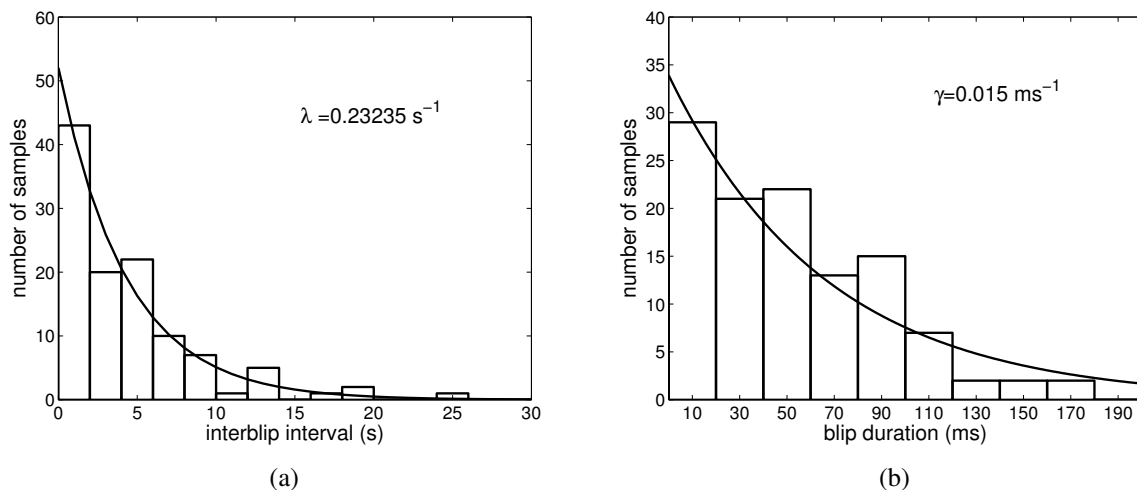

FIGURE S3: Interblip interval and blip duration distributions obtained by model simulation. We set  $p = 0.2 \mu\text{M}$  and  $a_{h_{42}} = 1 \text{ s}^{-1}$  for both cases. (a) The IBI distribution is fit by Eq. 15 with a  $\lambda$  of about  $0.23 \text{ s}^{-1}$ . (b) The blip duration distribution is fit by Eq. S11 with a  $\gamma$  of  $0.015 \text{ ms}^{-1}$ .

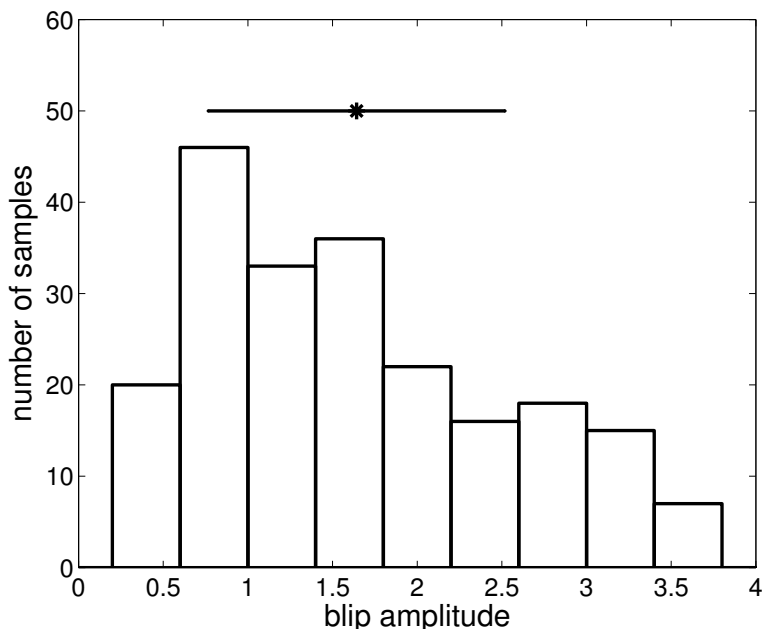

FIGURE S4: Blip amplitude distribution obtained by model simulation. Samples are gathered from two simulations using two  $IP_3$  concentrations,  $0.1 \mu\text{M}$  or  $0.2 \mu\text{M}$ . Blip amplitude is defined to be  $(F - F_0)/F_0$  where  $F$  and  $F_0$  are defined in the main text. Error bar shows the mean of about 1.6 and standard deviation of about 0.9. We set  $a_{h_{42}} = 1 \text{ s}^{-1}$ .



Blip duration distribution is also found experimentally to be an exponential (5), which is qualitatively reproduced by the model (see Fig. S3b). The curve is given by the following exponential distribution,

$$P_{BD} = \gamma e^{-\gamma t}, \quad (\text{S11})$$

which is derived from the below probability density function of puff duration proposed by Thurley *et al.* (6),

$$P_{PD} = N\gamma e^{-\gamma t} (1 - e^{-\gamma t})^{N-1}, \quad (\text{S12})$$

where  $N$  is the number of IP<sub>3</sub>Rs that are open at the peak of the puff and  $\gamma$  is the average closing rate of a single IP<sub>3</sub>R. When  $N = 1$ , Eq. S12 becomes Eq. S11 containing only one parameter  $\gamma$ .

Fig. S4 shows the blip amplitude distribution with mean of about 1.6 and standard deviation of about 0.9. Based on the mean of blip amplitude, we choose 3 as the sampling threshold to determine which are competent puffs in the puff traces (Fig. 2 in the main text) for statistical analysis.

## Interpuff interval distributions for various $a_{h_{42}}$

In the main text, we have shown in Fig. 4 that the fit curves of IPI distributions vary as  $a_{h_{42}}$  varies. Each of the fit curves is obtained by choosing appropriate values of  $\lambda$  and/or  $\xi$  in Eq. 14 or Eq. 15 so that the corresponding IPI histogram can be fit nicely. Fig. S5 shows some of the fitting results together with the corresponding values of  $\lambda$  and/or  $\xi$ .

## Dependence of puff amplitude on $a_{h_{42}}$

To understand how  $a_{h_{42}}$  influences puff amplitude, we plot average puff amplitude and maximum puff amplitude for different values of  $a_{h_{42}}$  in Fig. S6. We find that, as  $a_{h_{42}}$  increases, both the average and maximum initially increase but then get saturated at about  $a_{h_{42}} = 0.5 \text{ s}^{-1}$ . Moreover, this trend seems to be independent on IP<sub>3</sub> concentration. The results show that very small recovery rate from Ca<sup>2+</sup>-inhibition could eventually decrease observed puff amplitude, whereas not too small recovery rate would not significantly change puff amplitude. Therefore, if  $a_{h_{42}}$  can be known experimentally, we could then know whether the number of IP<sub>3</sub>Rs is severely underestimated by observed puff amplitude and to what extent it is underestimated. Accordingly, if the number of IP<sub>3</sub>Rs is known, we could also roughly estimate the range of  $a_{h_{42}}$ .

## Dependence of puff amplitude on IPI

In the main text, model results have shown the preceding puff has definitely an inhibitory effect on the occurrence of the next puff (see Figs. 5 and 7) and this effect comes from the slow recovery of  $h_{42}$  (see Fig. 3). This means a long IPI is easier to lead to a larger puff, as most IP<sub>3</sub>Rs have been restored to resting states. A more straightforward relation of puff amplitude and IPI can be seen in Fig. S7 wherein puff amplitude is directly plotted in terms of the preceding IPI. We can see in the scatter plot that as the preceding IPI increases, puff amplitude also follows a gradually increasing trend but seems to get saturated when IPI is longer than 2 s. The saturation can be seen clearly in Fig. S8a wherein we group those points

in Fig. S7 in bins of IPI and then calculate average puff amplitude in each bin. This result is qualitatively consistent with the experimental data in (7).

We also find that where the saturation occurs depends on  $a_{h_{42}}$ . In Fig. S8, we test two cases of  $a_{h_{42}}$ ,  $1 \text{ s}^{-1}$  (a) and  $0.1 \text{ s}^{-1}$  (b). Noting that the saturation occurs at about  $1 \sim 2 \text{ s}$  for  $a_{h_{42}} = 1 \text{ s}^{-1}$  but at about  $8 \sim 12 \text{ s}$  for  $a_{h_{42}} = 0.1 \text{ s}^{-1}$ , we predict that the saturation should occur at about  $1/a_{h_{42}}$ . Importantly, this provides a way of estimating the slow recovery rate  $a_{h_{42}}$  experimentally, as Fig. S8 can be easily obtained using experimental data.

In addition, we find the following IPI seems to be independent on the preceding puff amplitude by looking at the scatter plot similar to Fig. S7 (results not shown). This could be explained by Fig. 3 in the main text, where we can see the inactivation variable  $h_{42}$  will quickly drop down to be very close to 0 during a puff regardless of the puff amplitude. Therefore, the inhibitory effect from preceding puffs with various amplitudes on the following IPIs is nearly identical.

## Dependence of puff $[\text{Ca}^{2+}]$ amplitude on the number of $\text{IP}_3\text{Rs}$ at a puff site

As seen in Fig. 8 in the main text, puff amplitude is a piecewise nonlinear function of the number of  $\text{IP}_3\text{Rs}$  ( $N_{\text{IPR}}$ ). However, if using  $[\text{Ca}^{2+}]$  instead of normalized  $\text{Ca}^{2+}$ -bound buffer as puff amplitude, we find that average puff  $[\text{Ca}^{2+}]$  amplitude is linearly related to  $N_{\text{IPR}}$  (see Fig. S9). This result shows the nonlinear relation of puff amplitude and  $N_{\text{IPR}}$  in Fig. 8 is caused by the nonlinear relationship between  $[\text{Ca}^{2+}]$  and  $\text{Ca}^{2+}$ -bound fluo-4.

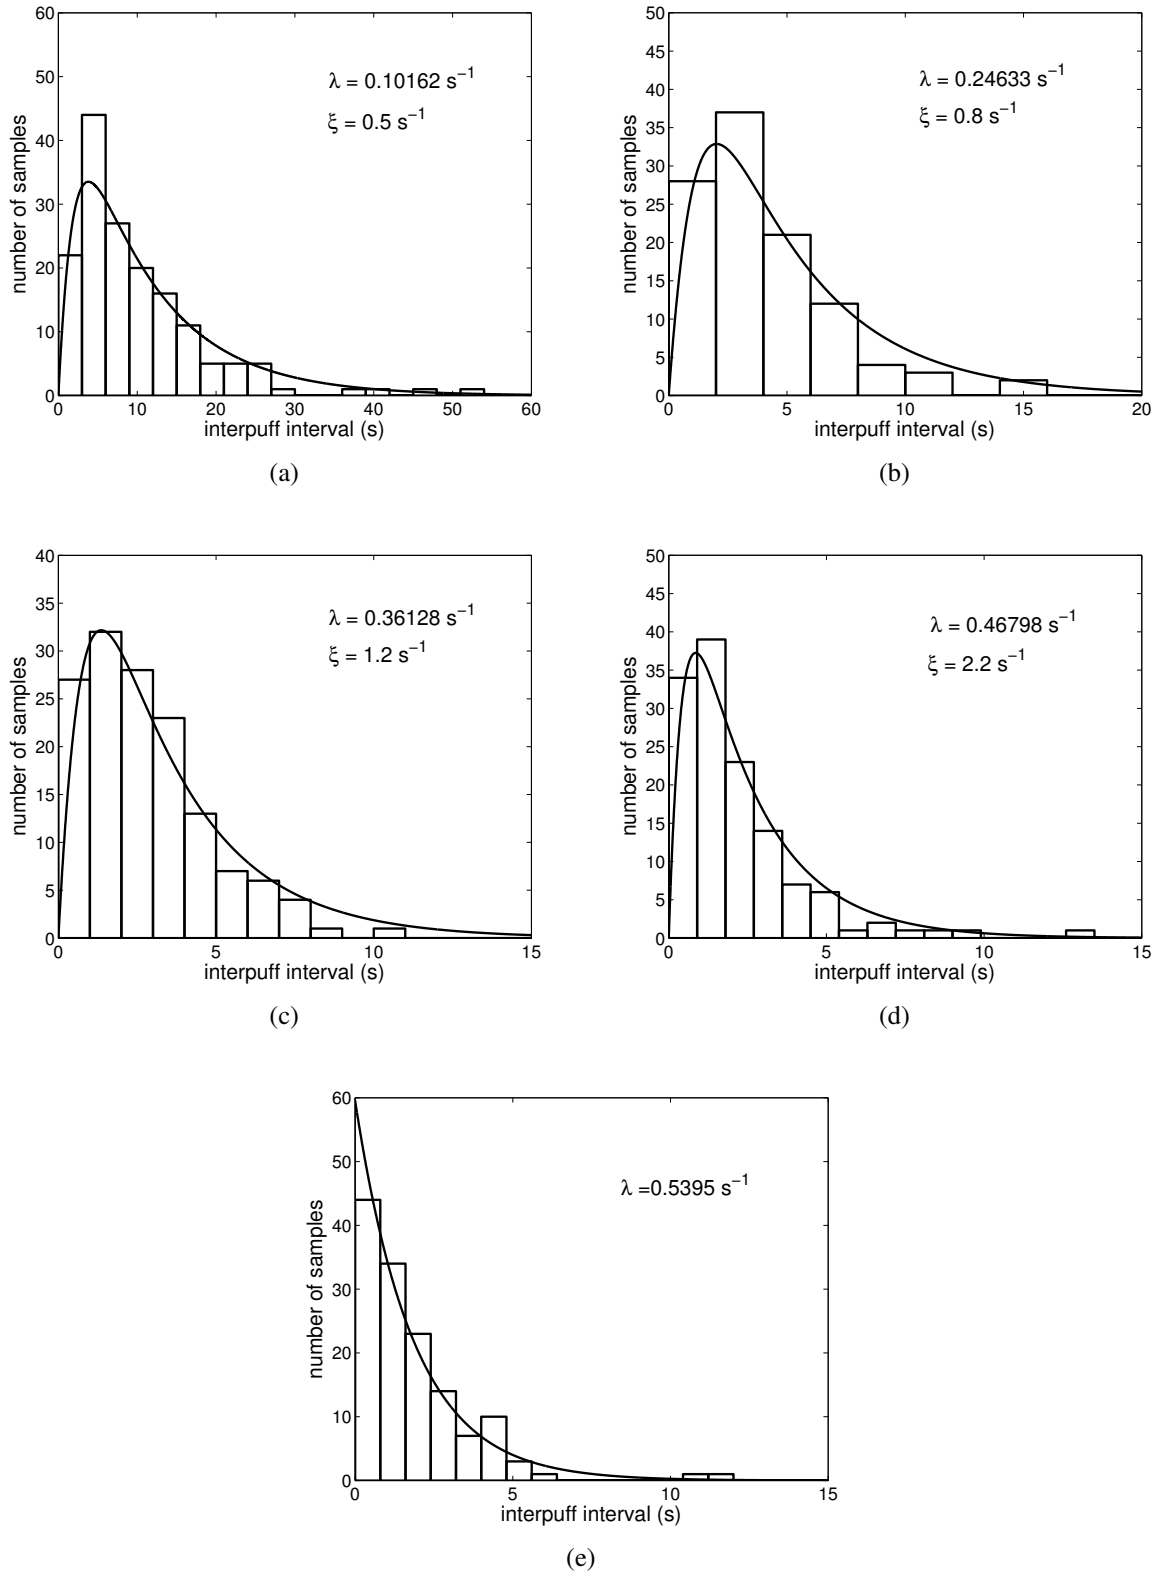

FIGURE S5: Various IPI distributions are well fit by Eq. 14 or Eq. 15 in the main text with appropriate values of  $\lambda$  and/or  $\xi$  shown in each of the sub figures. 5 values of  $a_{h_{42}}$ ,  $0.1 \text{ s}^{-1}$  (a),  $0.5 \text{ s}^{-1}$  (b),  $1 \text{ s}^{-1}$  (c),  $2 \text{ s}^{-1}$  (d) and  $5 \text{ s}^{-1}$  (e), are chosen. We set  $N_{IPR} = 10$  and  $p = 0.1 \mu\text{M}$ .

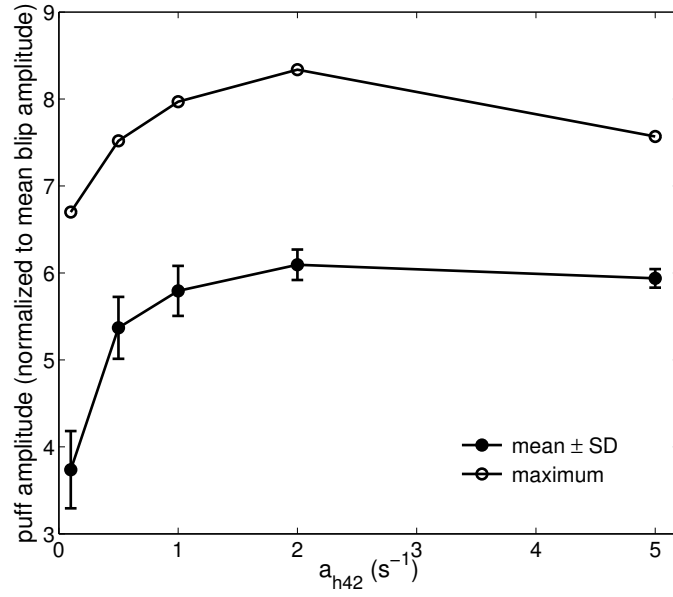

(a)

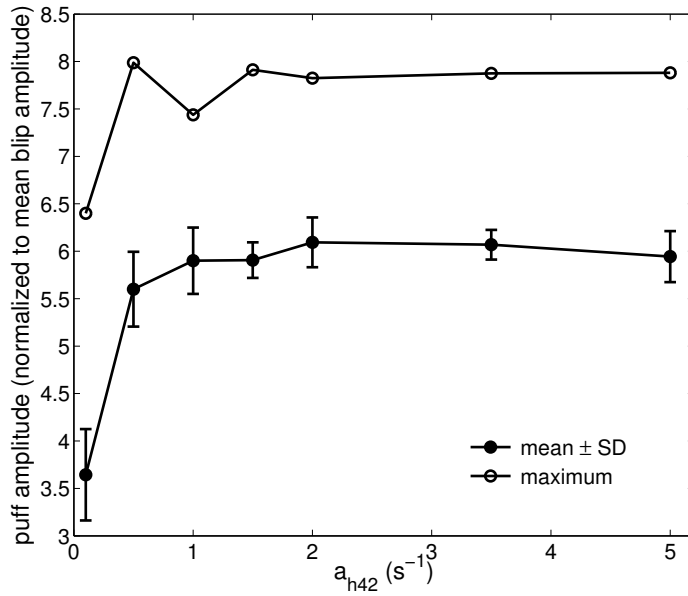

(b)

FIGURE S6: Dependence of puff amplitude on  $a_{h42}$ . Average puff amplitude (filled circle with error bar) and maximum puff amplitude (empty circle) are plotted for various values of  $a_{h42}$ . Puff amplitudes have been normalized to the mean blip amplitude of 1.6. We perform two simulations with two different  $IP_3$  concentrations,  $0.05 \mu M$  (a) and  $0.1 \mu M$  (b), respectively. We set  $N_{IPR} = 10$ .

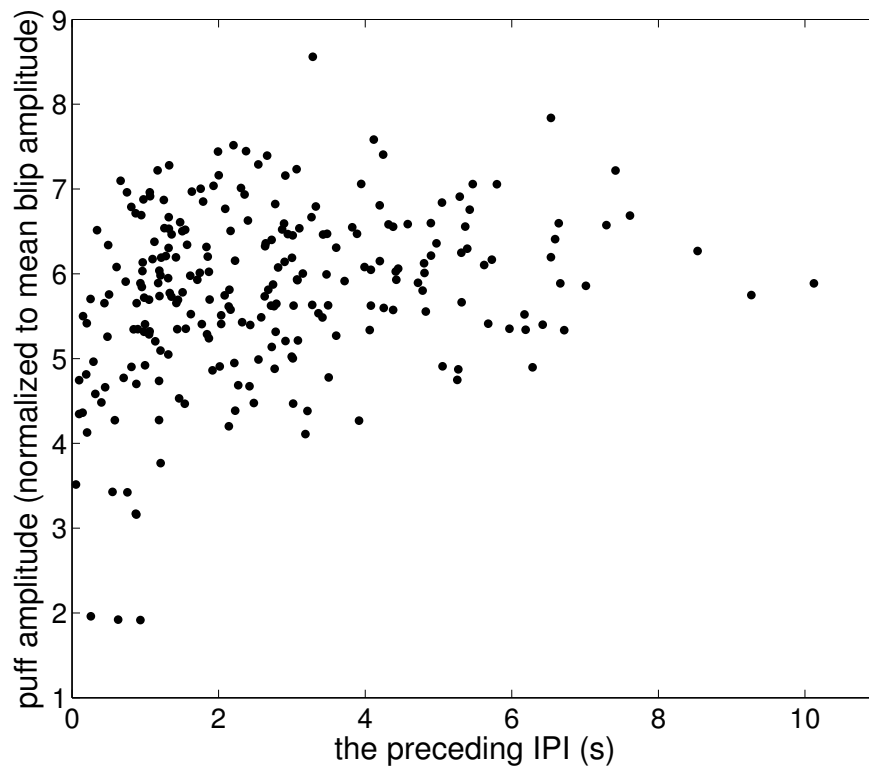

FIGURE S7: Scatter plot shows the relation of puff amplitude and the preceding IPIs. Puff amplitude has been normalized to the mean blip amplitude of 1.6. We set  $N_{IPR} = 10$ ,  $p = 0.1 \mu\text{M}$  and  $a_{h_{42}} = 1 \text{ s}^{-1}$ .

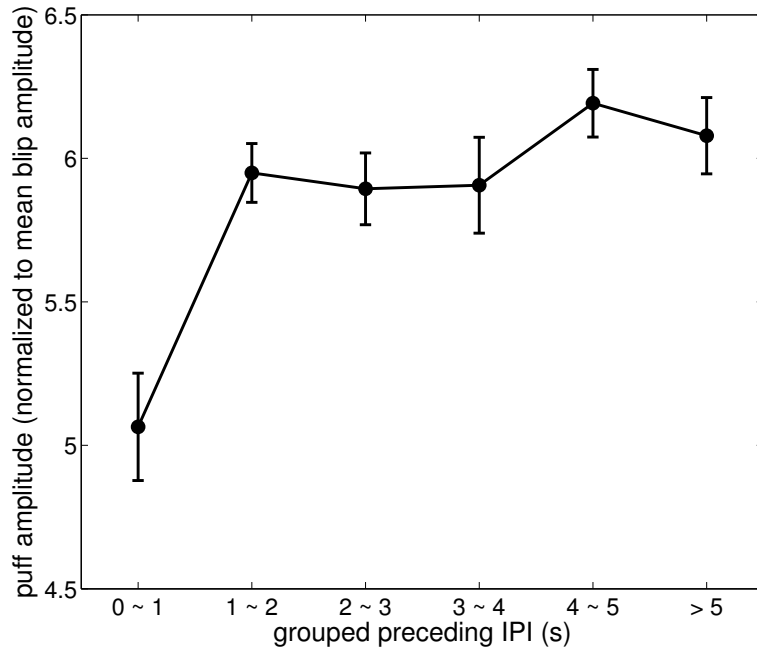

(a)

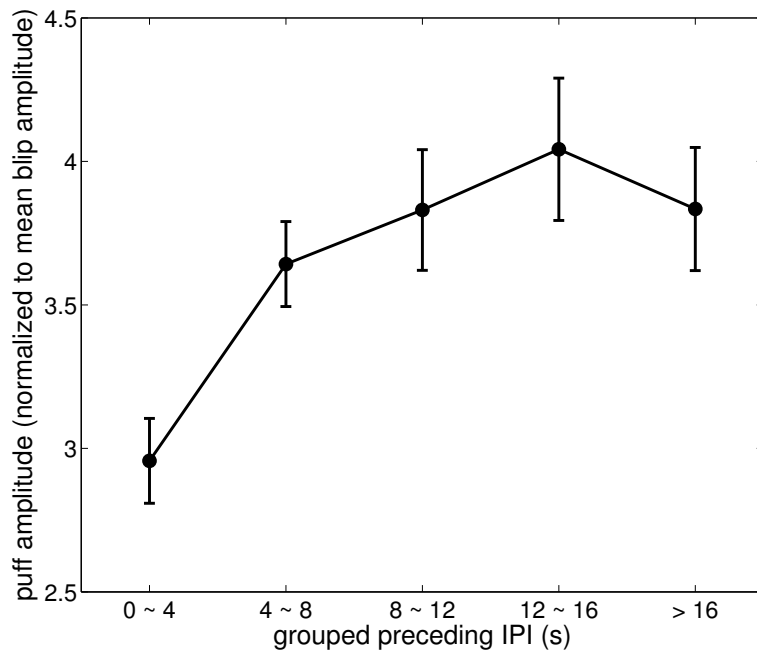

(b)

FIGURE S8: Average puff amplitude is plotted in terms of grouped preceding IPIs. Simulations are performed for two different values of  $a_{h_{42}}$ ,  $1 \text{ s}^{-1}$  (a) and  $0.1 \text{ s}^{-1}$  (b). Puff amplitude has been normalized to the mean blip amplitude of 1.6. In each bin, there are about  $10 \sim 30$  samples. Results are expressed to be  $\text{mean} \pm \text{SE}$ . We set  $N_{IPR} = 10$  and  $p = 0.1 \mu\text{M}$ .

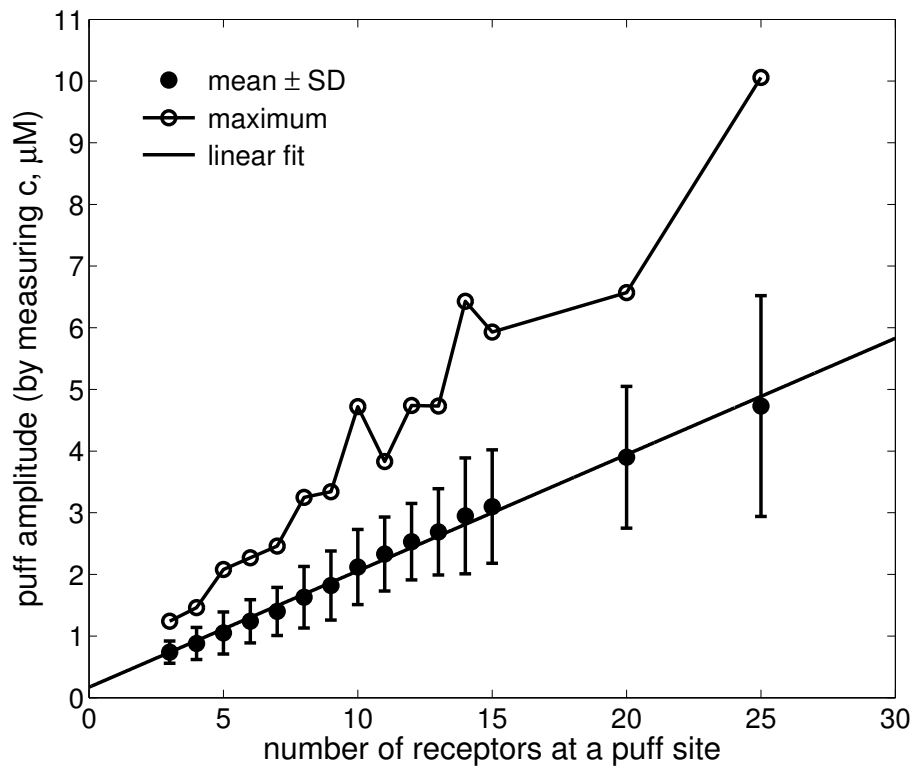

FIGURE S9: Dependence of average puff amplitude (filled circle) and the largest puff amplitude (empty circle) expressed by  $[\text{Ca}^{2+}]$  on the number of  $\text{IP}_3\text{Rs}$  at a puff site. A linear fit to the average puff  $[\text{Ca}^{2+}]$  amplitude is shown by the solid line. We set  $p = 0.1 \mu\text{M}$  and  $a_{h_{42}} = 1 \text{ s}^{-1}$ .

## References

1. Siekmann, I., L. E. Wagner, D. I. Yule, E. J. Crampin, and J. Sneyd. 2012. A kinetic model for IP<sub>3</sub>R type I and type II accounting for mode changes. *Biophys. J.* 103: 658–668.
2. Shuai, J., H. J. Rose, and I. Parker. 2006. The number and spatial distribution of IP<sub>3</sub> receptors underlying calcium puffs in *Xenopus* oocytes. *Biophys. J.* 91: 4033–4044.
3. Rüdiger, S., J. Shuai, and I. Solovey. 2010. Law of mass action, detailed balance, and the modeling of calcium puffs. *Phys. Rev. Lett.* 105: 048103.
4. Mak, D.O.D., J. E. Pearson, K. H. Cheung, S. Datta, M. Fernandez-Mongil, and K. J. Foskett. 2007. Rapid ligand-regulated gating kinetics of single IP<sub>3</sub>R Ca<sup>2+</sup> release channels. *EMBO Reports* 8: 1044–1051.
5. Smith, I. F., and I. Parker. 2009. Imaging the quantal substructure of single IP<sub>3</sub>R channel activity during Ca<sup>2+</sup> puffs in intact mammalian cells. *Proc. Natl. Acad. Sci. USA.* 106(15): 6404–6409.
6. Thurley, K., A. Skupin, R. Thul, and M. Falcke. 2012. Fundamental properties of Ca<sup>2+</sup> signals. *Biochimica et Biophysica Acta.* 1820(8): 1185–1194.
7. Fraiman, D., B. Pando, S. Dargan, I. Parker, and S. P. Dawson. 2006. Analysis of puff dynamics in oocytes: interdependence of puff amplitude and interpuff interval. *Biophys. J.* 90: 3897–3907.
